1 For submission to: **PLOS ONE**

**Correspondence:**

Stephen M. Rich, Ph.D.  
Department of Microbiology  
418 Morrill Science Center IVN  
University of Massachusetts  
Amherst, MA 01003-9298  
Phone: 413-545-5225  
email: [smrich@umass.edu](mailto:smrich@umass.edu)

2  
3  
4  
5  
6  
7  
8  
9  
10  
11  
12 A new paradigm for personal protection against ticks: efficacy of spatial  
13 repellents to reduce host seeking activities in three major tick species of  
14 medical importance

15  
16 **Eric L. Siegel<sup>1</sup>, Marcos Olivera<sup>2</sup>, Esteban Martinez Roig<sup>2</sup>, Melynda Perry<sup>3</sup>, Andrew Y. Li<sup>4</sup>,**  
17 **Sebastián D'hers<sup>2</sup>, Noel M. Elman<sup>5</sup>, and Stephen M. Rich<sup>1\*</sup>**

18  
19 1 Laboratory of Medical Zoology, Department of Microbiology, University of Massachusetts,  
20 Amherst, Massachusetts, USA, 2 Computational Mechanics Center. Instituto Tecnológico de  
21 Buenos Aires (ITBA), Ciudad Autónoma de Buenos Aires, Argentina, 3 Textile Materials  
22 Evaluation Team, Combat Capabilities Development Command Soldier Center, US Army  
23 Garrison-Natick, Natick, Massachusetts, USA, 4 USDA-ARS, Invasive Insect Biocontrol &  
24 Behavior Laboratory, Beltsville, Maryland, USA, 5 GearJump Technologies, LLC., Brookline,  
25 Massachusetts, USA

26  
27 \* [smrich@umass.edu](mailto:smrich@umass.edu)

28

29

30

## 31 **Abstract**

32 Addressing the prevalence of tick-borne disease requires robust chemical options as an integral  
33 component of Integrative Vector Management (IVM) program. Spatial repellency is a novel  
34 concept in tick bite prevention. To date, there is no standard for the evaluation of spatial  
35 repellency against ticks, despite the speculated value of volatilized chemicals in control systems.  
36 This study reports a novel vertical climb assay that was specifically created for the quantitative  
37 evaluation of spatial repellency in ticks. Controlled release devices (CRDs) were used to control  
38 the dispersion of multiple Active Ingredients (AIs) transfluthrin, metofluthrin, nootkatone, and  
39 DEET against adult females of three medically important tick species: *Dermacentor variabilis*,  
40 *Amblyomma americanum*, and *Ixodes scapularis*. Results of our study indicate significant  
41 associations between AI exposure and changing in tick climbing behavior when compared  
42 controls in the absence of the AI, from several perspectives, including changes in tick movement  
43 velocity, displacement, detachment, and rate of successful vertical climbing. Metofluthrin and  
44 transfluthrin caused strong reductions in host seeking activities against *D. variabilis* and *A.*  
45 *americanum*, while both demonstrated slightly weaker effects against *I. scapularis*. Further work  
46 is planned to evaluate spatial repellency in ticks in more natural environments and assess their  
47 potential in future tick control programs.

48  
49 **Keywords:** active ingredients (AIs), controlled-release device (CRD), olfaction, pyrethroid,  
50 spatial repellency, spatial repellents (SRs), ticks

51

52

## 53 **Introduction**

54 Ticks are the principal arthropod vectors of a variety of human, livestock, and companion animal  
55 disease in North America, such as Lyme disease, Anaplasmosis, and Babesiosis [1]. The  
56 prevalence of these zoonotic diseases has increased recently due to shifts in host population  
57 dynamics, particularly with the white-tailed deer, that affect tick population size [2]. Targeting of  
58 live arthropod populations is an important component of Integrative Vector Management (IVM)  
59 programs aimed at addressing the climbing incidence of these diseases [3,4]. Interventions used  
60 for mitigating risk include source reduction and personal protection. Chemical means of source  
61 reduction entail large-scale ground spraying or treatment of reservoir hosts to kill ticks in the  
62 environment, while personal protective methods seek to reduce risk to individual humans  
63 through smaller-scale, personal chemical application. Repellents can be classified as contact  
64 repellents, requiring physical contact with the treated source, or Spatial Repellents (SRs), acting  
65 by volatilized AI. With spatial compounds, vapor phase concentration and arthropod inherent  
66 sensitivity determine whether repellency will occur over a given space [5]. A new generation of  
67 Active Ingredients (AIs) derived from synthetic pyrethroids are often described as SRs and allow  
68 for non-contact protection from vectors that cover large distances, such as mosquitoes and biting  
69 flies [6]. SRs can maintain their efficacy by sustaining a spatial concentration over time with  
70 dispersion control methods. Controlled release devices (CRDs) that modulate SR dispersion  
71 therefore play a key role in efficacy [7].

72         The actions of repellent AIs are based on multiple target biomechanisms, including  
73 attraction-inhibition, irritation, and intoxication. The host-seeking behavior and ecology of ticks,  
74 however, challenges the applicability of these repellent biomechanisms that are traditionally used  
75 to combat more agile, flying arthropods. DEET (*N,N-diethyl-3-methylbenzamide*) is the most

76 prominent commercial arthropod contact repellent and the gold standard against which novel AIs  
77 are compared [8]. It deters mosquitoes from landing on a treated surface by interfering with  
78 receptors on antennae that would regularly detect host cues, such as heat and carbon dioxide [9].  
79 In ticks, however, DEET has been described to work as a contact irritant – with varied efficacy  
80 across multiple species [10]. Other known pyrethroids are also used as contact repellents in  
81 arthropod protection. Permethrin is an AI within this class frequently used in ultra-low volume  
82 (ULV)-spraying and other source reduction techniques. It repels and kills mosquitoes and other  
83 flying arthropods with direct droplet contact [11]. It is also used in personal protection as a  
84 clothing treatment for long-lasting tick protection through acaricidal action, with little signs of  
85 repellency [12].

86         The lack of a standardized method for evaluating non-lethal, behavior modifications in  
87 ticks stems from an incomplete understanding of tick olfaction at the molecular level and lack of  
88 defined actions in the host-seeking and feeding process [13]. Ticks are relatively slow moving,  
89 do not fly, and may spend days attached to a host, making repellency efforts difficult to quantify.  
90 The traditional strict definition of repellency wherein the arthropod makes an oriented movement  
91 away from the AI source is therefore not always appropriate in evaluation against ticks, despite  
92 being a primary focus and metric in arthropod repellent research [14]. In mosquitoes, repellency  
93 is characterized by action that prevents landing on a host. In ticks, repellency can be  
94 demonstrated by actions that prevent movement onto a host, direction to a favorable site of  
95 feeding, and attachment. Research on chemical repellents against ticks has so far focused on  
96 contact repellency. There is a critical need to evaluate and understand spatial repellency of  
97 volatile repellent compounds and their potentials for use in personal protection against tick bites.

98           Herein we present a novel assay to evaluate spatial repellency in ticks, considering the  
99 controlled release of an AI, i.e. metofluthrin, transfluthrin, nootkatone, and DEET, against each  
100 of the three predominant species of ticks affecting North America: *Dermacentor variabilis*,  
101 *Amblyomma americanum*, and *Ixodes scapularis*. This assay has been named Vertical Tick  
102 Assay for Evaluation of Spatial Repellents (VTA-ESR) and provides a quantitative model of  
103 ambushing ticks in an evaluation of metrics related to innate host-seeking tick behavior.

## 104 **Materials and methods**

### 105 **Chemicals**

106           Four repellent compounds were tested in this study, including DEET (30% commercial  
107 formulation; Ben's, Littleton, NH, USA), metofluthrin (generic supplier), transfluthrin (Bayer  
108 Corporation, Pittsburgh, PA, USA), nootkatone (Sigma-Aldrich, St. Louis, MO, USA). Isopropyl  
109 alcohol (IPA, Sigma-Aldrich, St. Louis, MO, USA) was used as a solvent to make test 30% test  
110 solutions of metofluthrin (v/v), transfluthrin (v/v), and nootkatone (w/v).

### 111 **Ticks**

112           Specific pathogen-free *Amblyomma americanum*, *Dermacentor variabilis*, and *Ixodes scapularis*  
113 adult, female ticks were obtained from the tick-rearing facility at the Oklahoma State University,  
114 Department of Entomology and Plant Pathology, National Tick Research and Educational  
115 Resource. Additional ticks were flagged from North Amherst, Massachusetts. Ticks were stored  
116 in 48 mm (h) x 20 mm (w) plastic vials with plastic caps of 5 mm diameter orifice covered with  
117 woven, cotton cloth to prevent ticks from escaping. Four ticks were stored in each vial at 4°C.  
118 The containers were removed from refrigeration weekly and opened for 10 minutes. The cloth,  
119 vials, and containers were checked thoroughly at this time for evidence of fungal growth. If

120 evidence of growth was noted on the vials, the ticks were moved to clean vials. Ticks were  
121 handled with autoclaved forceps and paintbrushes. Two hours preceding the repellency trial,  
122 ticks were equilibrated in an incubator at 23°C at 90 % relative humidity (RH). A total of  
123 267 total female ticks were used in this study, including 81 *A. americanum* 96 *D. variabilis*, and  
124 90 *I. scapularis*

## 125 **Experimental setup**

126 The tick behavior test system consisted of (1) a chemical-emanating device, which was  
127 specifically designed for the sustained spatial release of test repellent formulations (Figures 1,2),  
128 (2) a tick behavioral test chamber, and (3) a computer-based tick movement tracking system  
129 (Ethovision, Noldus Information Technology, Leesburg, VA, USA) (Figure 2). The tick  
130 behavioral test chamber was assembled from six clear, acrylic sheets: four 60 cm (l) x 30 cm (w)  
131 x 0.5 cm (z) sheets form the bottom, top, front, and back faces, while two 30 cm (l) x 30 cm (w)  
132 x 0.5 cm (z) sheets form the sides. The sheets were connected by living hinge plastic connectors  
133 (6 cm (l) x 2 cm (w) x 4 cm (z)). Two hinge connectors were used on each face, positioned one  
134 inch from either edge (Figure 2). The top sheet rested on top of hinge connectors but were not  
135 connected to allow for placement of the active ingredient, and introduction of the ticks into the  
136 trials. There was a 5 mm wide opening lining the exterior of the box, created by the placement  
137 of the hinge connectors. Between trials, the acrylic sheets were disconnected, cleaned with IPA,  
138 and allowed to dry. Three sticks, 32 cm (l) x 0.3 cm (diameter), were used for each climbing  
139 experiment. The sticks were adhered to the inside of the top sheet by a 1 cm x 1 cm square of  
140 Crayola air-dry clay, cut with a sterile #10 scalpel. The three sticks were placed along the center  
141 width of the lid, 2.5 cm from either side and in the center. After each trial, the climbing sticks  
142 and clay were discarded, and the walls of the chamber were cleaned with IPA.

143 **Figure 1.** Controlled Release Device (CRD). Diffusion occurs through a small pore shown in the  
144 outer surface.

145  
146 **Figure 2.** Experimental setup for trials from the perspective of the position-tracking camera. The  
147 three 30-cm sticks (fiber diffusers, Simoutal brand) are shown adhered to the top lid with air-dry  
148 clay. The device is positioned on upper left side wall in all trials, in the center of the z axis and at  
149 the height equal to the top of the stick. The device emits the AI in the direction of the sticks.  
150 Clear acrylic sheets (four 30 x 60 cm, two 30 x 30 cm) compose the walls of the box, attached by  
151 plastic hinge connectors.

152

## 153 *In Silico* Simulations

154 AI release rates from CRDs were characterized using analytical formulations of transfluthrin and  
155 metofluthrin, assessing volatilization for a period equal to the duration of the experiment. For  
156 this measurement, emanating devices were placed in a sealed bottle and a 50 mL air sample was  
157 extracted via syringe chemistry tools based on Gas Chromatography Mass Spectroscopy  
158 Analysis (GCMS). Extracted air samples were dissolved in 5 mL of IPA and injected directly  
159 into the GCMS for the measurement of AI concentrations relative to a known standard.  
160 To address AI concentration effect on tick behavior, numerical simulations based on  
161 Computational Fluid Mechanics (CFD) were performed to address the transport of formulated AI  
162 evaporated into still air inside the test chamber. Fluid natural convection, chemical diffusion and  
163 gravity momentum were considered. For further detailed description on the simulations, please  
164 refer to the Appendix.

## 165 **Repellency bioassay**

166 The CRD containing a particular test repellent solution was placed at the upper end of the  
167 chamber (Figure 2). An induction time of 20 minutes after each initial device activation was set  
168 prior to the introduction of the ticks for each trial. Each trial included 3 female ticks of the same  
169 species. One tick was placed at the base of one of the 3 vertical sticks. The array of three  
170 climbing sticks in the chamber allowed the assessment of effect of the AI diffusion in the

171 chamber. From the eye of the camera, the CRDs were placed in the upper left hand of the  
172 chambers. Hence the three sticks left to right were positioned along a concentration gradient.  
173 Ticks were evaluated for inclusion in the trial by briefly placing them at the base of a stick. If the  
174 tick climbed the stick, it was included in the trial. Ticks unable to hold on to the stick, detached,  
175 or unwilling to climb were excluded. Climbing trials were conducted by removing the chamber  
176 lid with the attached climbing sticks, inverting it, placing ticks on the top quarter of the climbing  
177 stick and allowing them to climb to the top of that stick. The entire lid with three climbing sticks  
178 with ticks at top was then inverted and placed on the walls of chamber so that the ticks were at  
179 the bottom of the climbing sticks. These treatments were compared to controls performed in  
180 same fashion without AI.

### 181 **Video tracking of tick movements**

182 Tick mobility was tracked with a computer vision system [15]. Each experiment was generated  
183 with a pre-defined template held consistent through each trial, maintaining constant capture rate,  
184 arena centering and size (camera field of view), and detection criteria for tracking. Tick  
185 movements were tracked for time periods of 10 minutes. To measure repellency, climbing trials  
186 were conducted in presence of AIs and compared with tick activity in absence of the AI. Height  
187 (cm) was recorded frame by frame. This allowed the analyses of velocity, displacement, and  
188 detachment. Velocity is measured as the rate of movement (cm/sec). Displacement is total  
189 distance moved through course of the trial. Detachment is defined as when ticks fall from sticks.  
190 An integrative measure of pseudo-questing considered the time ticks spent at the top of the box  
191 (27-30 cm) to simulate questing behavior of ambushing ticks. Finally, climbing height reduction  
192 considered the cumulative amount of time that ticks spent 27-30 cm, normalized to control trials.



193 Each trial or experiment, as described above to test responses of each tick species to each  
194 compound, was repeated 4 to 6 times to allow statistical analysis of data. Responses to an AI-  
195 free environment were used as negative control to allow assessment of effects of the test  
196 repellent compounds.

## 197 **Statistical analyses**

198 Statistical analyses were performed in SPSS for Windows, version 28.0 following the retrospective  
199 correction of insignificant movement captured by the computer vision system [16]. This was done  
200 in SPSS through filtration of movement points less than 0.05 cm/s, a point slightly less than the  
201 minimum velocity that ticks were observed to move. Measured parameters did not assume the  
202 normal distribution. Skewed data were not transformed and were therefore analyzed using non-  
203 parametric methods. Mann-Whitney U (MWU) tests were applied to continuous data considering  
204 mean velocity and pseudo-questing tendency. All ticks were included in each analysis except for  
205 velocity. Ticks that did not move during the trials were omitted from the velocity analysis. Effect  
206 size ( $r$ ) was calculated to provide an indicator of the magnitude of difference between treatment  
207 and control groups to supplement probability values. Results were considered significant in cases  
208 where  $U < U_{crit}$  at a significance threshold  $\alpha < .05$ , following SAMPL guidelines [17,18]. These  
209 results were then interpreted according to Cohen's classification of effect size at 1 degree of  
210 freedom: 0.1-0.3 small, 0.3-0.5 medium, and  $> 0.5$  large [19]. Two-tailed fisher's exact tests  
211 analyzed the difference in proportions of treatment trials to control trials in climbing success and  
212 detachment analyses. Effect size was also calculated for each Fisher's exact test ( $\phi$ ) and interpreted  
213 similarly to those of MWU tests. Significant probability values are reported in figures 6-8 and are  
214 presented in tiers: \*  $p < .05$ , \*\*  $p < .01$ , \*\*\*  $p < .001$ .

## 215 **Results**

## 216 **Controlled release device characterization and *in silico* model**

217 GCMS results for the first 30 minutes were calculated as 3.1 mg/hr for the transfluthrin  
218 formulation and 4.4 mg/hr for the metofluthrin formulation. Concentration plots of transfluthrin  
219 and metofluthrin, in parts per billion (ppb), were plotted for 25 minutes in logarithmic scale  
220 (Figure 3). A logarithmic concentration plot of transfluthrin and metofluthrin on the sticks is also  
221 shown at 25 minutes (Figure 4). Higher AI concentrations were found on the bottom surface.  
222 This is caused by gravity that dominates the flow, making it plummet since the AIs are heavier  
223 than air. Therefore, the fluid density is higher where the AIs and isopropanol are, keeping the  
224 concentration levels high on the bottom and low on the top. In the long term however, the  
225 concentration increases from the bottom up due to diffusion, as there is a large concentration  
226 gradient between the bottom and the top of the container. At higher heights, the concentration  
227 remains low, both because gravity tends to keep the heavier molecules at lower heights and  
228 diffusion is low because of the low concentration gradient present.

229 **Figure 3.** Simulation Results. A. Concentration of transfluthrin in ppb at 25 minutes. B.  
230 Concentration of metofluthrin in ppb at 25 min. The larger box represents the full front view of  
231 the chamber. The right, smaller portion is a half section from the perspective of the side.

232  
233 **Figure 4.** Concentration of transfluthrin (A) and metofluthrin (B) profiles at the sticks at  
234 timestamps of 25 min.

235

## 236 **Control observations**

237 Control trials established baseline behaviors that were compared with ticks exposed to each  
238 active ingredient. When the ticks were placed in the assay box, they climbed to the top of their  
239 stick. They rarely moved down the stick or detached. *A. Americanum* ticks took slightly longer to  
240 orient than the other species at the bottom of their stick but climbed to the top with a mean  
241 velocity much greater than that of any *D. variabilis* or *I. scapularis* ticks. They also showed more

242 aggressive behavior, characterized by efforts to attempt to escape the experimental area through  
243 the top of the box, breaching the intersection of the stick and the top sheet of the box. Some ticks  
244 (2/15) detached, but only after having reached the top. No *D. variabilis* or *I. scapularis* ticks  
245 detached. *I. scapularis* ticks move slower, tending to settle slightly below the top of the stick  
246 (Table I). The ticks of the same species move at a similar velocity that does not vary much based  
247 on time or height. All ticks survived both control and AI trials.

248 **Table 1.** Comparison of tick detachments among three tick species in response to the control and  
249 AI trials.

250

251

| Species              | Proportion of ticks that detached during trials |                           |                         |                          |                          |
|----------------------|-------------------------------------------------|---------------------------|-------------------------|--------------------------|--------------------------|
|                      | Control                                         | Metofluthrin              | Transfluthrin           | DEET                     | Nootkatone               |
| <i>A. americanum</i> | 2/15                                            | 3/15                      | 2/15                    | 3/18                     | 2/18                     |
| <i>D. variabilis</i> | 0/15                                            | 4/24                      | 2/21                    | 1/18                     | 2/18                     |
| <i>I. scapularis</i> | 0/18                                            | 6/18                      | 1/18                    | 5/18                     | 2/18                     |
| Sum                  | 2/48 (4.2%)                                     | 13/57 (22.8%)<br>P = .010 | 4/54 (7.4%)<br>P = .681 | 9/54 (16.7%)<br>P = .056 | 6/54 (11.1%)<br>P = .276 |

254

## 255 Tick detachment

256 Few *A. americanum* detached from their sticks in control trials (2) however only once reaching  
257 the top, and no *I. scapularis* or *D. variabilis* in theirs. (Table I). Metofluthrin exposure was  
258 associated with the greatest number of ticks detaching in each species in all AI trials (*A.*  
259 *americanum*: (3/15) *D. variabilis*: (4/24), *I. scapularis* (6/18). There was a significant difference  
260 between the total proportion of ticks that detached when exposed to metofluthrin (22.8%)  
261 compared to controls (4.2%),  $P = 0.010$ . Transfluthrin and nootkatone did not significantly affect  
262 the proportion of ticks detaching in their presence (1-2 in each case per species). In the presence  
263 of DEET, *D. variabilis* did not show an increase in detachment (1/18). The proportion of *A.*  
264 *americanum* and *I. scapularis* that detached in its presence were both higher (*A. americanum*:  
265 3/18, *I. scapularis*: 5/18), though DEET results were also non-significant.

## 266 Climbing height reduction

267 The tick response to each AI as measured by position, is plotted showing the mean time ticks  
268 spent at positions along the stick during the trials as a measure of height reduction (Figure 5).  
269 Metofluthrin resulted in the greatest deterrence in *A. americanum* (74%) and *D. variabilis* (83%)  
270 but was slightly less effective in deterring *I. scapularis* (53%). Exposure to transfluthrin showed  
271 a similar pattern in each species but was slightly less effective in each case (*A. americanum*:  
272 67%, *D. variabilis*: 82%, *I. scapularis*: 49%). Nootkatone and DEET were ineffective in  
273 deterring the presence of *A. americanum* (20%, 0%), but were more effective in *D. variabilis* and  
274 *I. scapularis*, showing a larger deterrence (nootkatone: 75% and 65%, DEET: 69% and 84%).

275 **Figure 5.** Cumulative distribution of presence 27-30 cm of AI trials are plotted against their  
276 respective controls. Transfluthrin and metofluthrin were particularly effective against *D.*  
277 *variabilis* and *A. americanum* but showed less of an effect against *I. scapularis*. Nootkatone and  
278 DEET did not affect *A. americanum*. However, they showed larger effects in *D. variabilis* and *I.*  
279 *scapularis*.

280

## 281 Mean displacement

282 The mean displacement of control ticks was compared to AI trials (Table 2). Control ticks of  
283 each species move approximately one length of the stick by the conclusion of the trial. *D.*  
284 *variabilis* controls moved a mean of 25 cm, *A. americanum* moved 28 cm, and *I. scapularis*  
285 moved 29 cm. Metofluthrin resulted in a reduction in displacement for all three species (*D.*  
286 *variabilis*: 11 cm, *A. americanum*: 7 cm, *I. scapularis*: 19 cm). Transfluthrin also resulted in a  
287 large reduction of displacement in *A. americanum* (6 cm) and smaller reductions in *D. variabilis*  
288 (23 cm) and *I. scapularis* (25 cm). DEET trials resulted in a small increase in displacement in *D.*  
289 *variabilis* trials (27 cm) and a very large increase in *A. americanum* (70 cm), however *I.*  
290 *scapularis* displacement however was reduced (18 cm). Mean *D. variabilis* displacement in the  
291 presence of nootkatone was slightly higher than that of the controls (29 cm). *A. americanum*

292 mean displacement was reduced slightly (24.5 cm), while *I. scapularis* mean displacement was  
293 increased (52 cm).

294 **Table 2. Comparison of** mean displacements among three tick species in response to the control  
295 and repellent compounds.

|               | <i>D. variabilis</i>   |                    | <i>A. americanum</i>   |                    | <i>I. scapularis</i>   |                    |
|---------------|------------------------|--------------------|------------------------|--------------------|------------------------|--------------------|
|               | Mean Displacement (cm) | Standard Deviation | Mean Displacement (cm) | Standard Deviation | Mean Displacement (cm) | Standard Deviation |
| Control       | 25.30                  | 4.41               | 27.75                  | 15.18              | 29.02                  | 17.54              |
| Metofluthrin  | 10.89                  | 10.61              | 7.11                   | 13.62              | 18.59                  | 17.38              |
| Transfluthrin | 22.81                  | 10.40              | 5.86                   | 9.17               | 24.61                  | 25.34              |
| Nootkatone    | 28.59                  | 5.28               | 24.50                  | 17.08              | 52.17                  | 60.54              |
| DEET          | 27.31                  | 8.57               | 69.87                  | 47.24              | 17.83                  | 16.87              |

296

## 297 **Comparisons of tick activity parameters**

298 AIs showed variable influence on the integrative activity parameters measured (Figures 6-8).

299 Most tick activity parameters measured in responses to DEET and Nootkatone were not

300 statistically significant, and effect sizes of those that were significant tended to be lower than

301 what were observed with transfluthrin and metofluthrin. Metofluthrin and transfluthrin showed

302 more significant and large effects from all perspectives against *D. variabilis* and *A. americanum*

303 but were generally less effective against *I. scapularis* (Table 3).

304 **Figure 6.** Climbing success of ticks in each control group is compared with ticks in AI trials as a  
305 measure of inhibition. A tick that is considered “successful” reaches the 27 cm-30 cm height mark  
306 of its stick without detaching and maintains a meaningful presence here, as measured by presence  
307 at this point at trial end (t = 600 sec). Difference of proportion show significant differences between  
308 AI and controls. *D. variabilis*: Metofluthrin  $\phi = 0.69$  ( $p < .001$ ), transfluthrin  $\phi = .71$  ( $p < .001$ ),  
309 nootkatone  $\phi = .52$  ( $p = .004$ ), DEET  $\phi = .56$  ( $p = .003$ ). *A. americanum*: Metofluthrin  $\phi = .61$  ( $p$   
310  $= .003$ ), transfluthrin  $\phi = .58$  ( $p = .002$ ), nootkatone  $\phi = .27$  ( $p = .212$ ), DEET  $\phi = .13$  ( $p = .589$ ).  
311 *I. scapularis*: Metofluthrin  $\phi = .68$  ( $p < .001$ ), transfluthrin  $\phi = .50$  ( $p < .007$ ), nootkatone  $\phi = .68$   
312 ( $p < .001$ ), DEET  $\phi = .54$  ( $p = .003$ ). Significant probability values are considered in tiers: \*  $p <$   
313  $.05$ , \*\*  $p < .01$ , \*\*\*  $p < .001$ .

314

315 **Figure 7.** Mean velocity of ticks while moving is compared between AI and control groups,  
 316 measured in cm/sec. Mann-Whitney U tests showed large, significant differences in *D. variabilis*  
 317 with metofluthrin ( $r = .79$ ,  $p < .001$ ) and transfluthrin ( $r = .82$ ,  $p < .001$ ), and much smaller, non-  
 318 significant differences with nootkatone ( $r = .14$ ,  $p = .443$ ) and DEET ( $r = .08$ ,  $p = .638$ ). *A.*  
 319 *americanum* showed similar results: metofluthrin  $r = .66$  ( $p < .001$ ), transfluthrin  $r = .71$  ( $p < .001$ ),  
 320 nootkatone  $r = .25$  ( $p = .140$ ), DEET  $r = .25$  ( $p = .158$ ). *I. scapularis* did not show significant effects  
 321 with metofluthrin ( $r = .31$ ,  $p = .067$ ) or transfluthrin ( $r = .26$ ,  $p = .113$ ). Significant differences,  
 322 though smaller in magnitude, were observed with nootkatone ( $r = .23$ ,  $p = .044$ ) and DEET ( $r =$   
 323  $.47$ ,  $p = .006$ ). Significant probability values are considered in tiers: \*  $p < .05$ , \*\*  $p < .01$ , \*\*\*  $p <$   
 324  $.001$ .

325 \* Outlier of magnitude 1.5-3x IQR

326 ° Outlier of magnitude 3x IQR or greater

327  
 328

329 **Figure 8.** A comparison of pseudo-questing tendency between AI and controls is shown. *D.*  
 330 *variabilis* showed significant reductions in the presence of all AIs: metofluthrin  $r = .76$ , ( $p < .001$ )  
 331 transfluthrin  $r = .76$ , ( $p < .001$ ), nootkatone  $r = .63$  ( $p < .001$ ), DEET  $r = .64$  ( $p < .001$ ). b) *A.*  
 332 *americanum* showed similar but slightly weaker results with each AI: metofluthrin  $r = .76$ , ( $p <$   
 333  $.001$ ) transfluthrin  $r = .63$ , ( $p < .001$ ), nootkatone  $r = .56$  ( $p = .001$ ), DEET  $r = .60$  ( $p < .001$ ). *I*  
 334 *scapularis* showed significant results with nootkatone ( $r = .74$ ,  $p < .001$ ), DEET ( $r = .41$ ,  $p = .014$ ) and  
 335 metofluthrin ( $r = .40$ ,  $p = .016$ ). Transfluthrin results were not significant ( $r = .26$ ,  $p = .121$ ).  
 336 Significant probability values are considered in tiers: \*  $p < .05$ , \*\*  $p < .01$ , \*\*\*  $p < .001$ .

337 \* Outlier of magnitude 1.5-3x IQR

338 ° Outlier of magnitude 3x IQR or greater

339

340 **Table 3.** Summary of statistical analysis of quantitative behavioral parameters.

| AI            | Species              | Climbing success ( $\phi$ ) | Velocity (r) | Pseudo-questing (r) |
|---------------|----------------------|-----------------------------|--------------|---------------------|
| Metofluthrin  | <i>D. variabilis</i> | .69***                      | .79***       | .76***              |
|               | <i>A. americanum</i> | .61**                       | .66***       | .76***              |
|               | <i>I. scapularis</i> | .68***                      | NS           | .40*                |
| Transfluthrin | <i>D. variabilis</i> | .71***                      | .82***       | .76***              |
|               | <i>A. americanum</i> | .59**                       | .71***       | .63***              |
|               | <i>I. scapularis</i> | .58**                       | NS           | NS                  |
| Nootkatone    | <i>D. variabilis</i> | .52**                       | NS           | .63***              |
|               | <i>A. americanum</i> | NS                          | NS           | .56**               |
|               | <i>I. scapularis</i> | .68***                      | .23*         | .74***              |
| DEET          | <i>D. variabilis</i> | .56**                       | NS           | .64***              |
|               | <i>A. americanum</i> | NS                          | NS           | .60***              |
|               | <i>I. scapularis</i> | .54**                       | .47**        | .41*                |

341

## 342 **Discussion**

343 The global burden of tick-borne disease is addressed through sustainable and integrative  
344 approaches that target live tick populations. Increasing incidence in tick-borne disease prompts  
345 the development of new options for chemical protection for humans and animals, necessitating  
346 both efficacious formulations of AIs and appropriate systems for their delivery. The next  
347 generation of innovation in tick protection aims to build on the shortcomings of the current  
348 industry standard and identify methods of protection that may apply to a wider range of zoonotic  
349 disease-transmitting vectors. Spatial repellency is a novel concept in ticks, however other  
350 zoonotic disease-harboring vectors are currently being targeted through volatilized compounds  
351 delivered by CRDs and passive methods, greatly contributing to the tactics available in  
352 integrative vector management. Metofluthrin and transfluthrin, for example, have demonstrated  
353 effective protection from mosquito bites in volatilized formulations [20]. An extension of use  
354 into tick control would prove invaluable in providing variety in the ways that ticks can be  
355 targeted to reduce the burden of bites and subsequent disease transmission. With applications in  
356 regions with overlapping presence of multiple vectors, reduction of disease prevalence from  
357 multiple species of arthropod vectors can be achieved with single modes of action.

358 Transfluthrin and metofluthrin were evaluated in the present study alongside two compounds  
359 traditionally used in non-volatilized, contact control tactics: the industry standard, DEET, and  
360 nootkatone – an acaricidal compound found in grapefruit skin used in environmental sprays for  
361 tick control [21]. There is no current standard for assessing spatial repellency in ticks, however  
362 the two targets of repellents are defined by the prevention of movement across a “protected”  
363 surface and preventing attachment for subsequent feeding and disease transmission. The VTA-  
364 ESR assay considers these in analyses of behaviors that are integral to a tick’s successful

365 navigation around these measures, revolving around successful climbing, which is required of a  
366 tick for host-seeking and feeding.

367 Ticks have a finite amount of energy and moisture available to fuel host-seeking. Thus,  
368 they must use this supply wisely [22]. In conditions conducive to host-seeking, they climb  
369 foliage and passively await a host. Ticks in the control groups for each species reliably climbed  
370 to the very top when placed at the bottom of their sticks. They tended to stay at the top, either  
371 attempting to escape the box through the top or settle at the top of the stick in a pseudo-questing  
372 position. Exposure to all four AIs was associated with significant reductions in pseudo-questing  
373 tendency in *D. variabilis* and *A. americanum*. This association was strongest with metofluthrin  
374 and transfluthrin in both species. In *I. scapularis*, nootkatone showed the strongest effect,  
375 however DEET and metofluthrin showed smaller, significant reductions. Only transfluthrin was  
376 not associated with a significant reduction. The deterrence from remaining at this pseudo-  
377 questing position may have implications to an inhibition of natural questing in ambushing ticks,  
378 however these metrics are unable to make this distinction from other stages of host-seeking and  
379 feeding as performed.

380 In addition to observing gross behaviors as a simulation of host-seeking, an activity  
381 analysis of velocity and displacement was performed to visualize any specific effects that AI-  
382 exposure may have had on their capability or desire to move, translating to a physical ability to  
383 carry out host-seeking and on-host movement. There were several occurrences of large changes  
384 in the distance ticks traveled. The greatest of which were with metofluthrin and transfluthrin,  
385 which reduced the displacement of all three species. DEET showed a meaningful reduction in *I.*  
386 *scapularis* and an increase in *A. americanum* but did not result in a change in *D. variabilis*.



387 Nootkatone showed the opposite in *A. americanum* and *I. scapularis*, but also didn't greatly  
388 affect *D. variabilis*.

389 Metofluthrin and transfluthrin showed very large, significant reductions in mean velocity  
390 relative to controls, but were less effective against *I. scapularis*. Nootkatone and DEET were not  
391 associated with a change in velocity in *D. variabilis* or *A. americanum* but showed a weak  
392 reduction in *I. scapularis* velocity. The reduction in velocity shown by metofluthrin and  
393 transfluthrin in *D. variabilis* and *A. americanum* could be evidence of visual effects of AI  
394 interference in ticks' natural ability to move. Increased distance moved relative to controls could  
395 indicate deterrence from questing or feeding by keeping the ticks moving. However, a decrease  
396 in time and distance moved could also be an indicator of ticks failing to reach a desired location.  
397 The changes in tick activity in both velocity and displacement perspectives illustrate effects by  
398 the AIs, alluding to applications in repellency evaluation.

399 Simulation results of transfluthrin and metofluthrin dispersion indicated the formation of  
400 a discernible concentration gradient, with greater concentrations distributed towards the bottom  
401 of the box and weaker towards the top. Tick natural behavior to climb up was affected by the AI  
402 concentration. This effect was visible immediately following tick introduction to the bottom box.  
403 Characterized by a propensity away from an immediate climb to the top of the stick (as seen in  
404 control trials), ticks in AI groups favored an increased amount of time spent towards the bottom  
405 and slower movement where concentrations were highest. The lack of tick movement opposing  
406 the concentration gradient indicates that the AIs do not act as a movement barrier at the present  
407 concentrations and means of use, but instead immediately disrupt favorable movement patterns  
408 aimed at the top of the box, pushing the ticks to continue questing for a safer place. The  
409 behavioral change is observed from the beginning of the tick insertion meaning short exposition

410 to AI even in low concentration is enough to disrupt the host seeking will. It is therefore possible  
411 that the concentration range used in these trials caused an intoxicating effect that led to a  
412 behavioral change.

413 Detachment is an important indicator of inhibition in the host-seeking and feeding  
414 behavior of ticks (Halos 2012). If a tick detaches, it is not feeding or transmitting disease,  
415 therefore detaching while moving up the stick could be indicative of a deterrent effect.  
416 Metofluthrin was the only AI that resulted in a larger number of ticks in all three species detach,  
417 although DEET exposure was associated in a large proportion of *I. scapularis detaching*.  
418 Transfluthrin and nootkatone were not associated with meaningful increases in detachment  
419 relative to controls in any of the three species. Detachment was considered in an integrative  
420 metric that also incorporated the height that ticks reached in a success/failure analysis of  
421 climbing. Exposure to transfluthrin and metofluthrin was associated with a stronger inhibition of  
422 successful climbing, when compared to nootkatone and DEET in *D. variabilis* and *A.*  
423 *americanum*, and showed similar, mild results in *I. scapularis*.

424 Overall, metofluthrin and transfluthrin showed potential for serving a role in tick  
425 protection, generally outperforming nootkatone and the gold standard in today's commercial tick  
426 protection, DEET, in *D. variabilis* and *A. americanum*. Both compounds showed slightly less  
427 effect in *I. scapularis*, however comparable to nootkatone and DEET. Nootkatone was  
428 particularly ineffective in all metrics when tested against *A. americanum* but performed better in  
429 some areas than the other AIs in *I. scapularis*.

430 Reasoning behind this variation in the degree of differences in behavior observed  
431 between species with these AIs is not well-understood. Observed sensitivity of ticks to AIs can  
432 vary based on the inherent differences between activity of the ticks, with more active species,

433 like *A. americanum*, generally producing an underestimation of true repellency simply due to  
434 their higher speed and agility. Beyond this, however, physiological and molecular differences  
435 between species likely result in differences in response.

436         The basis of tick olfaction begins on the terminal segment of the front legs, within the  
437 Haller's organ [23]. The Haller's organ is comprised of an anterior pit that detects humidity and  
438 a capsule that houses physiologically diverse olfactosensilla. The porous walls of olfactosensilla  
439 allow vaporized odorant molecules to enter and reach the lymph. Here, odorant binding proteins  
440 are selectively bound by odorant molecules. They are then solubilized and shuttled to odorant  
441 receptors on the dendrite of olfactory receptor neurons. Olfactory receptor neuron-reception of  
442 host-derived chemical stimuli, such as carbon dioxide, guides the host-seeking and questing  
443 process. Dendritic branching increases sensory cell surface area for detection of low  
444 concentrations of these odorant molecules, thus allowing this host-detection to occur at a  
445 distance [24]. Downstream molecular physiology beyond this has yet to be characterized,  
446 however variations in the structure of odorant binding proteins, odorant-degrading enzymes,  
447 degree of dendritic branching, and odorant receptor physiology may contribute to the  
448 interspecies differences in sensitivity to the active ingredients. Odorant receptor variability is  
449 likely similar to observed differences between species of other arthropods. For example, amino  
450 acid sequencing has revealed significant variability in mosquito odorant receptor composition  
451 [25]. However, genomic investigations into molecular basis of tick olfaction have failed to  
452 identify odorant receptors in the genome [26]. Further research is therefore needed to  
453 characterize the molecular mode of action in tick olfaction to compliment the analysis of novel  
454 tick-targeting chemicals. Because tick behavior is so olfactory-driven, further insight would be  
455 useful to guide product development [27].

456           The current study identified several behaviors that can help investigate effects of  
457 volatilized compounds against ticks. *In vitro* methods in preliminary assessments of novel AIs  
458 are limited in generalizability to more natural conditions, as the evaluation of repellency for  
459 practical use requires an assessment of both the novel AI and its intended formulation in a setting  
460 that considers the external factors that may negatively impact product efficacy. Abrasion,  
461 temperature, humidity, and wind can affect the potential of a formulation and alter the extent to  
462 which the targeted vector responds. Furthermore, factors such as different binding properties to  
463 clothing, hair, and skin and trans-epithelial transport can affect the environmental diffusion of  
464 the AI [10]. The present study is however an integral early step in the product development  
465 process. Ticks have a natural tendency to climb. In the absence of host cues, a demonstration of  
466 suppressed efforts to reach desirable positioned, modeled with the vertical climb assay is a first  
467 step to determining possible effects. Subsequent studies can build on this work to incorporate  
468 more environmental conditions, host cues, and evaluate the AIs at different concentrations,  
469 release rates, and in different delivery methods.

## 470 **Conclusion**

471 The development of an ideal repellent requires an active ingredient with a formulation that can  
472 offer efficacious protection against diverse disease-transmitting vectors in a safe, pleasant  
473 formula for consumer use [28]. Applied to ticks, a chemical should operate in two levels of tick  
474 protection: preventing travel over a treated surface and preventing attachment. The current assay  
475 is unable to distinguish which of the two are being simulated, however the behavior changes that  
476 are considered here may be applicable to each. Tick response to volatilized compounds, as  
477 opposed to tactile chemoreception, has been speculated in the past but has yet to be effectively  
478 demonstrated. The VTA-ESR is therefore useful for the evaluation of several behavior factors

479 applicable to natural tick activity. Exposure to all four AIs was associated with significant  
480 changes in tick behavior of varying degree. Transfluthrin and metofluthrin exposures showed an  
481 overall greater extent of behavioral differences in all three species. The magnitude of effect for  
482 all AIs was reduced in *I. scapularis* when compared to *A. americanum* and *D. variabilis*. This  
483 study serves as an initial analysis of spatial repellency in ticks and a preliminary assessment of  
484 these AIs for future field application, identifying changes in behavior associated with non-tactile  
485 control methods which vary by species. Future studies are needed in the presence of more natural  
486 conditions to characterize effects in nature, however the results presented here are integral to  
487 reaching this step.

488

## 489 **Acknowledgements**

490 The authors would like to thank Mr. Kevin Smith as representative of Bayer Environmental  
491 Sciences for providing the Active Ingredient to conduct the research. His enthusiasm and  
492 corporate contribution are greatly appreciated.

493 This article reports the results of research only. Mention of a proprietary product does not  
494 constitute an endorsement or a recommendation by the authors, USDA, or DoD for its use. The  
495 USDA is an equal opportunity provider and employer.

## 496 **Author contributions**

497 Conceptualization: Elman, Li, Rich, .....

498 Funding acquisition: Elman, Rich

499 Formal Analysis: D'hers, Olivera, Roig, Siegel

500 Investigation: Siegel

501 Methodology: Elman, D'hers, Perry, Rich, Siegel  
502 Supervision: Rich  
503 Writing – Elman, D'hers, Rich, Siegel  
504 Writing – review & editing: Elman, D'hers, Li, Rich, Siegel

## 505 **References**

- 506 1. Rochlin I, Toledo A. Emerging tick-borne pathogens of public health importance, a mini-  
507 review. *J Med Microbiol*. 2020;69(6): 781-91.
- 508 2. Paul REL, Cote M, Le Naour EL, Bonnet SI. Environmental factors influencing tick  
509 densities over seven years in a French suburban forest. *Parasit Vectors*. 2016;9: 309-19.
- 510 3. Madison-Antenucci S, Kramer LD, Gebhardt LL, Kauffman E. Emerging tick-borne  
511 diseases. *Clin Microbiol Rev*. 2020;33(2): 1-26.
- 512 4. Matthews G. Integrated vector management: controlling vectors of malaria and other insect  
513 vector borne diseases. Hoboken (NJ): John Wiley & Sons, Inc.; 2011.
- 514 5. DeGennaro M. The mysterious multi-modal repellency of DEET. *Fly*. 2015; 9(1): 45-51.
- 515 6. Achee NL, Bangs MJ, Farlow R, Killeen GF, Lindsay S, Logan JG, et al. Spatial repellents:  
516 from discovery and development to evidence-based validation. *Malar J*. 2012;11(164).
- 517 7. Stevenson JC, Simubali L, Mudena T, Cadrol E, Bernier UR, Vasquez AA, et al.  
518 Controlled release spatial repellent devices (CRDs) as novel tools against malaria  
519 transmission: a semi-field study in Macha, Zambia. *Malar J*. 2018;17(437).
- 520 8. Yap HH, Jahangir K, Zairi J. Field efficacy of four insect repellent products against vector  
521 mosquitoes in a tropical environment. *J Am Mosq Control Assoc*. 2000;16(3):241-4.
- 522 9. Leal WS. The enigmatic reception of DEET – the gold standard of insect repellents. *Curr*  
523 *Opin Insect Sci*. 2014; 1(6): 93-8.
- 524 10. Bissinger BW, Apperson CS, Sonenshine DE, Watson DW, Roe MW. Efficacy of the new  
525 repellent BioUD against three species of ixodid ticks. *Exp Appl Acarol*. 2009;48(3):239-  
526 50.
- 527 11. Bowman NM, Akialis K, Cave G, Barrera R, Apperson CS, Meshnick SR. Pyrethroid  
528 insecticides maintain repellent effect on knock-down resistant populations of *Aedes*  
529 *aegypti* mosquitoes. *PLOS ONE*. 2018;13(5)

- 530 12. Lane RS. Treatment of clothing with a permethrin spray for personal protection against the  
531 western black-legged tick, *Ixodes pacificus* (Acari: Ixodidae). *Exp Appl Acarol.*  
532 1989;6(4):343-52.
- 533 13. Farone N, Light M, Scott C, MacPherson S, Hiller NK. Chemosensory and behavioural  
534 responses of *Ixodes scapularis* to natural products: role of chemosensory organs in volatile  
535 detection. *Insects.* 2020;11(8).
- 536 14. Halos L, Baneth G, Beugnet F, Bowman AS, Chomel B, Farkas R. Defining the concept of  
537 ‘tick repellency’ in veterinary medicine. *Parasitology*, 2012;139(4):419-23.
- 538 15. EthoVision XT (RRID:SCR\_000441), Noldus Information Technology, Leesburg, VA,  
539 USA. Version 15.0 [software]. Available from: <https://www.noldus.com/ethovision>.
- 540 16. SPSS Statistics for Windows (RRID:SCR\_002865), Version 28.0 [software]. Armonk, NY:  
541 IBM Corp. Available from: <https://www.ibm.com/spss/statistics>
- 542 17. Altman DG. *Practical statistics for medical research.* Boca Raton (FL): CRC Press; 1990.
- 543 18. Lang TA, Altman DG. Statistical analyses and methods in the published literature: The  
544 SAMPL guidelines. *Medical Writing.* 2016; 25(3): 31-35.
- 545 19. Sullivan GM, Feinn R. Using effect size – or why the p value is not enough. *J Grad Med*  
546 *Educ.* 2012;4(3): 279-82.
- 547 20. Andreatza F, Valbon WR, Wang Q, Liu F, Xu P, Bandason E, et al. Sodium channel  
548 activation underlies transfluthrin repellency in *Aedes aegypti*. *PLOS Negl Trop Dis.*  
549 2021;15(7).
- 550 21. Bharadwaj A, Stafford KC, Behle RW. Efficacy and environmental persistence of  
551 nootkatone for the control of the blacklegged tick (Acari: Ixodidae) in residential  
552 landscapes. *J Med Entomol.* 2012;49(5): 1035-44.
- 553 22. McClure M, Diuk-Wasser MA. Climate impacts on blacklegged tick host-seeking  
554 behavior. *Int J Parasitol.* 2019;49(1): 37-47.
- 555 23. Carr AL, Mitchell DR, Dhammi A, Bissinger BW, Sonenshine DE, Roe RM. Tick Haller's  
556 Organ, a new paradigm for arthropod olfaction: how ticks differ from insects. *Int J Mol Sci.*  
557 2017;18(7): 1563.
- 558 24. Schmidt HR, Benton R. Molecular mechanisms of olfactory detection in insects: beyond  
559 receptors. *Open Biol.* 2020;10(10).

- 560 25. Zwiebel LJ, Takken W. Olfactory regulation of mosquito-host interactions. *Insect Biochem*  
561 *Mol Bio.* 2004;34(7), 645-52.
- 562 26. Gulia-Nuss M, Nuss AB, Meyer JM, Sonenshine DE, Roe RM, Waterhouse RM, et al.  
563 Genomic insights into the *Ixodes scapularis* tick vector of Lyme disease. *Nat Commun.*  
564 2016.
- 565 27. Carr AL, Salgado VL. Ticks home in on body heat: A new understanding of Haller's organ  
566 and repellent action. *PLOS ONE.* 2019;14(8).
- 567 28. Fradin MS. Mosquitos and mosquito repellents: a clinician's guide. *Ann Intern Med.*  
568 1998;128(11): 931-40.
- 569 29. Weller HG, Tabor G, Hasak H, Fureby C. A tensorial approach to computational  
570 continuum mechanics using object-oriented techniques. *Computers in Physics.* 1998;12(6).
- 571 30. Deshpande SS, Anumolu L, Trujillo MF. Evaluating the performance of the two phase flow  
572 solver interFoam. *Computational Science & Discovery.* 2012; 5:14-16.
- 573 31. Wardle KE, Weller HG. Hybrid multiphase CFD solver for coupled dispersed/segregated  
574 flows in liquid-liquid extraction. *International Journal of Chemical Engineering.* 2013
- 575 32. OpenFOAM: OpenCFD Ltd, Bracknell, United Kingdom. Available from:  
576 <https://www.openfoam.com>, 2021.
- 577 33. Menter FR. Two equation eddy-viscosity turbulence modeling for engineering applications.  
578 *AIAA Journal.* 1994;32: 1598-1605.
- 579 34. Greenshields C. OpenFOAM 2.3.0: Multiphase modeling predictor-corrector semi-implicit  
580 MULES.  
581  
582  
583  
584  
585  
586  
587  
588



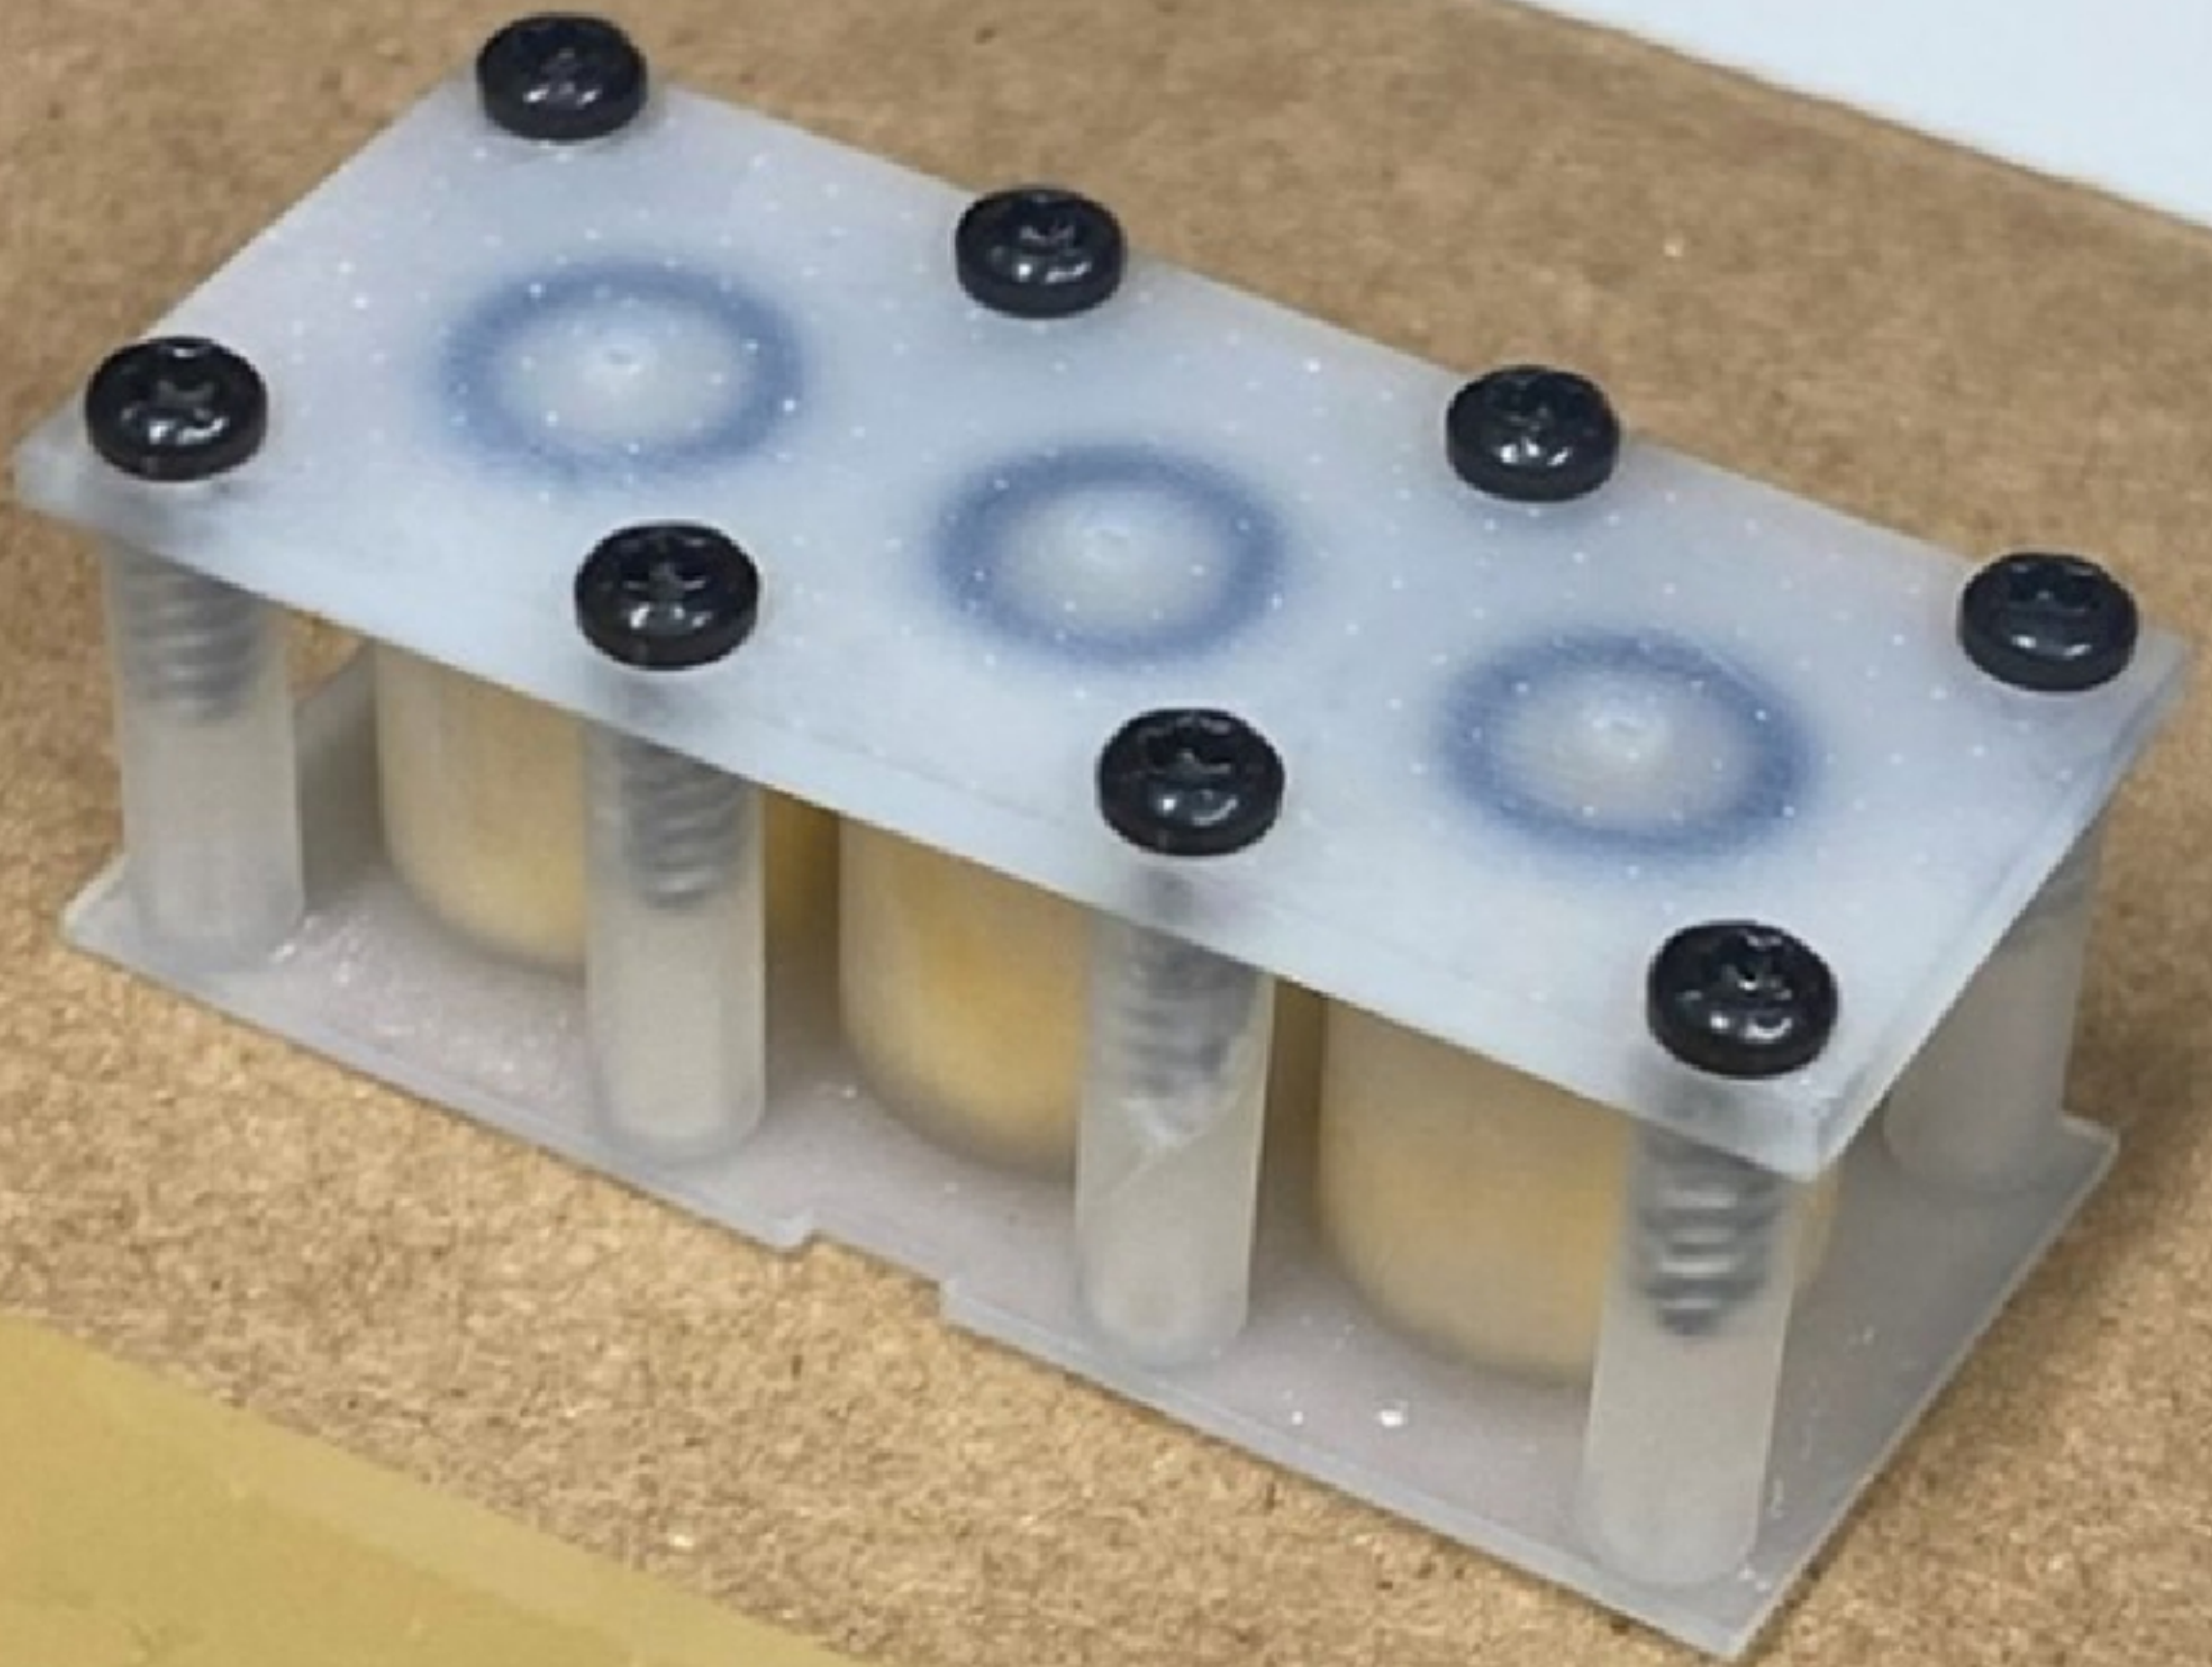

Figure 1

# IN VITRO ASSAY

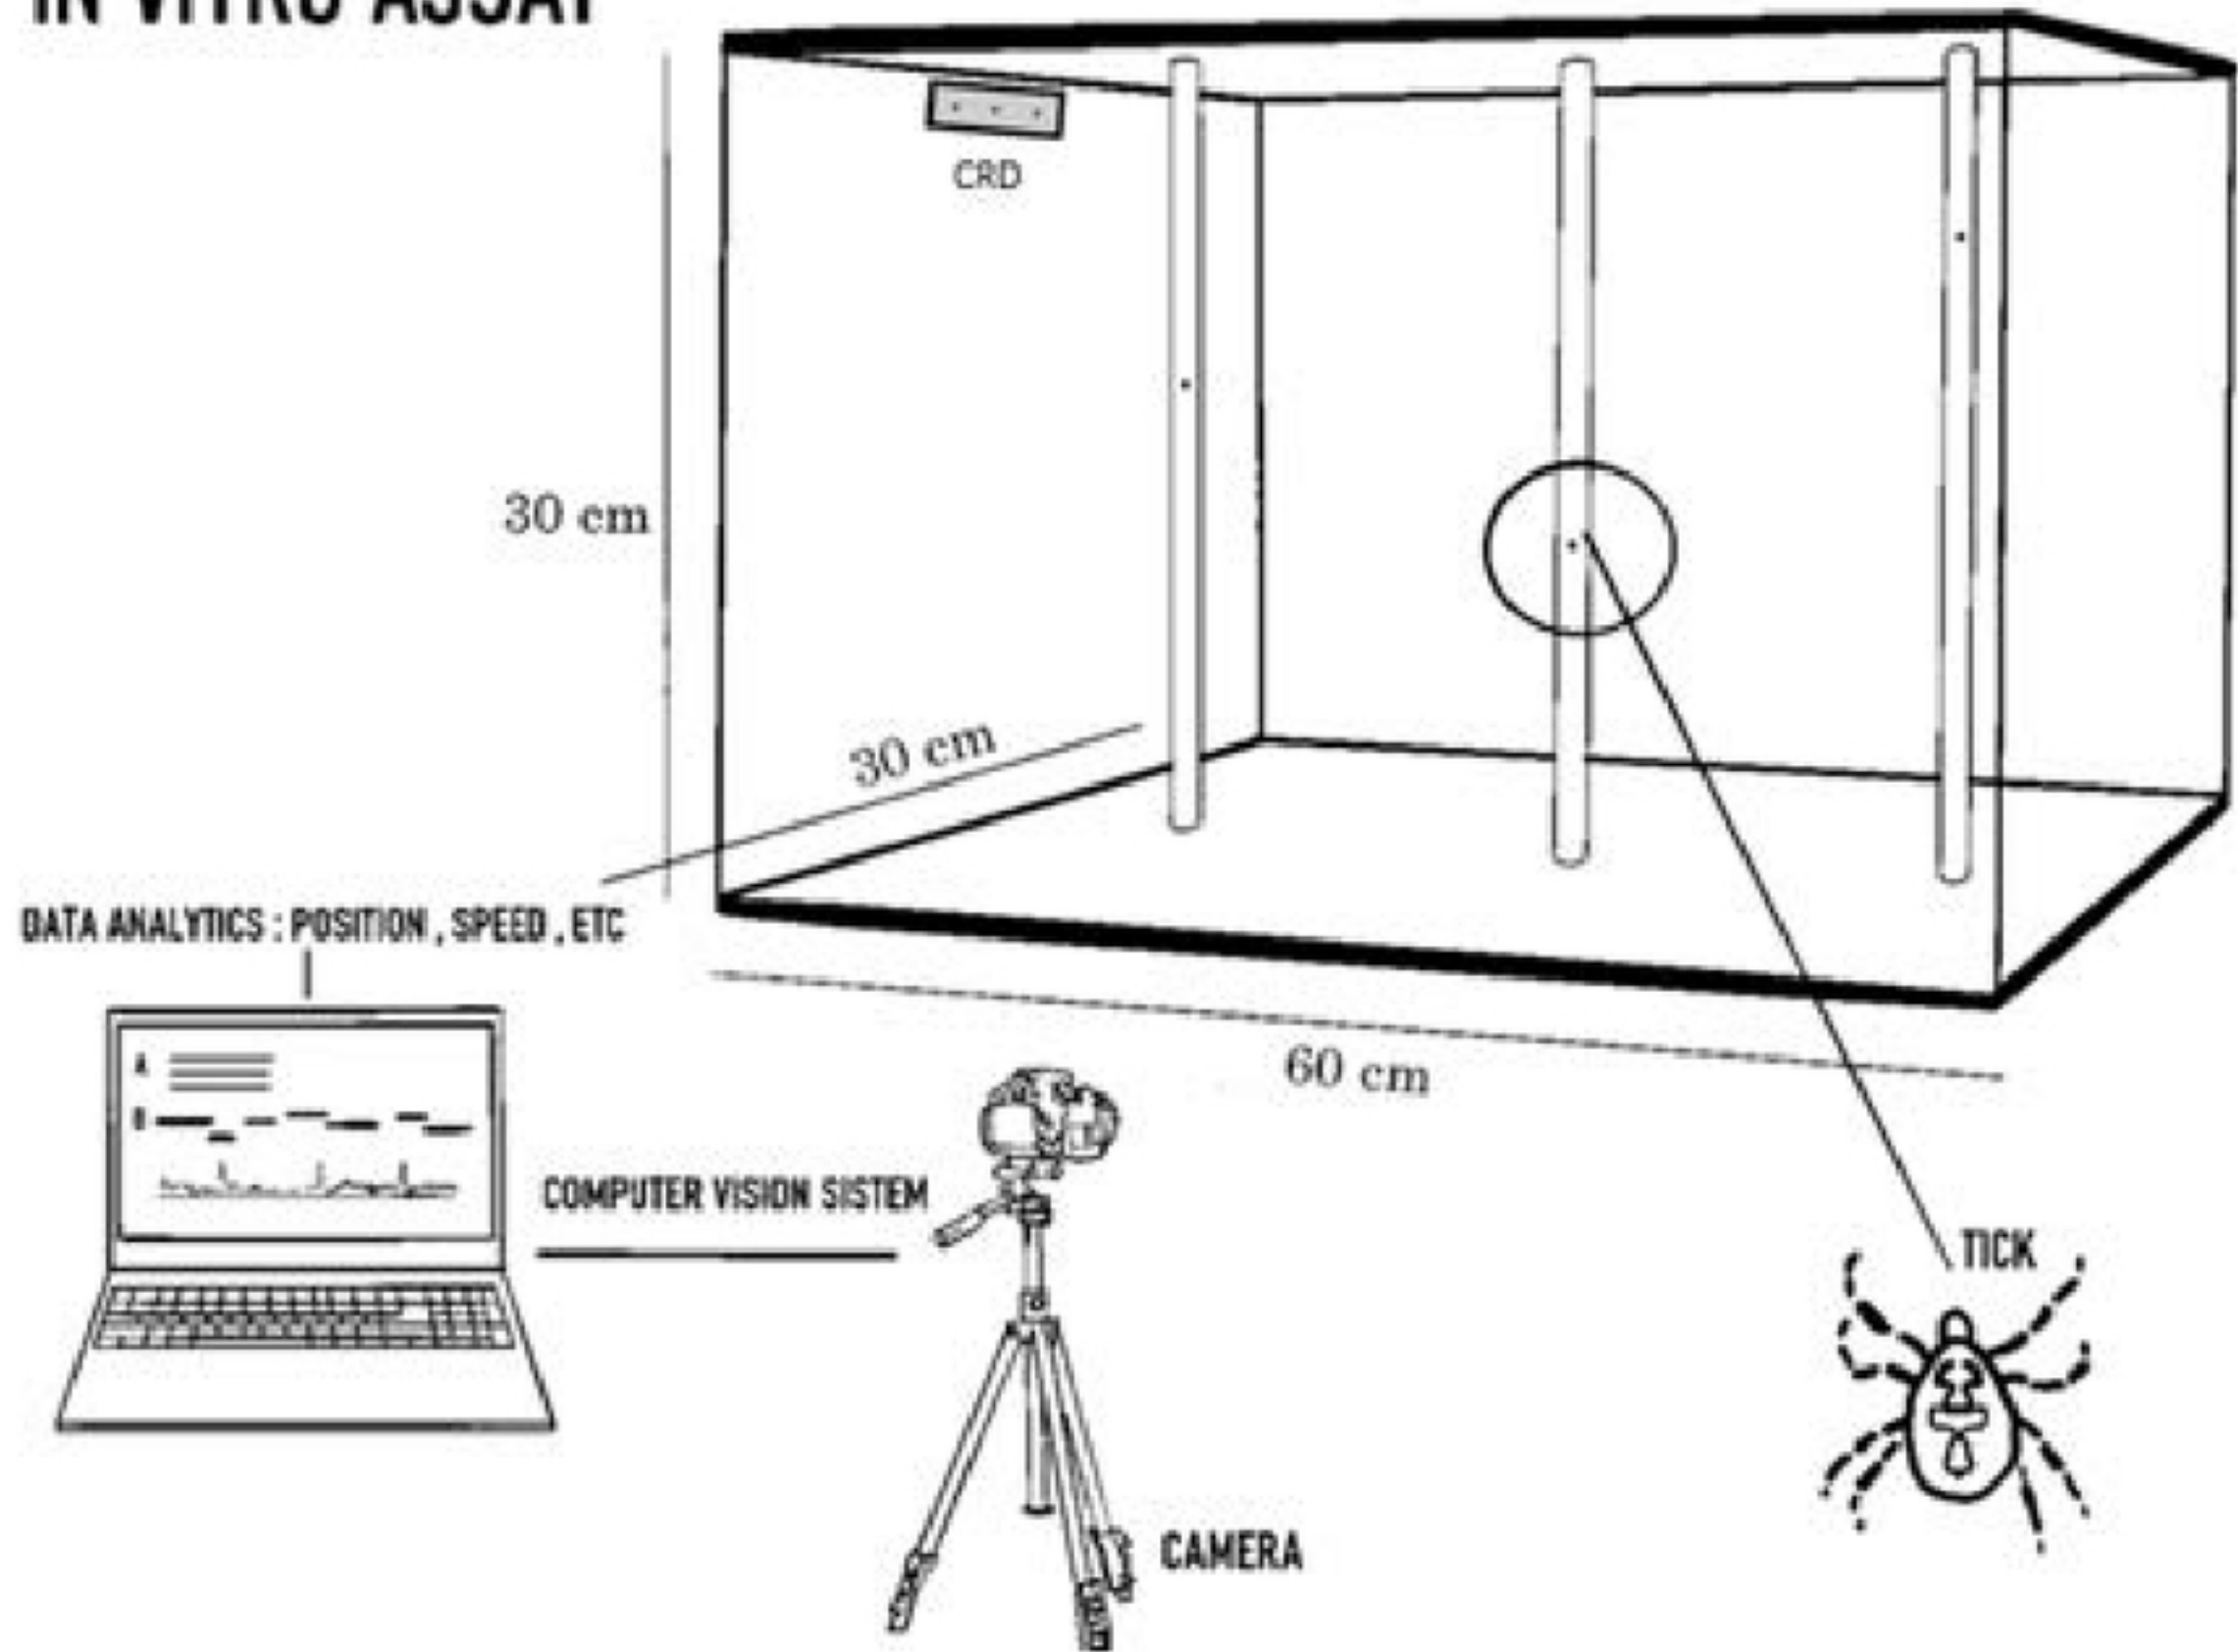

Figure 2

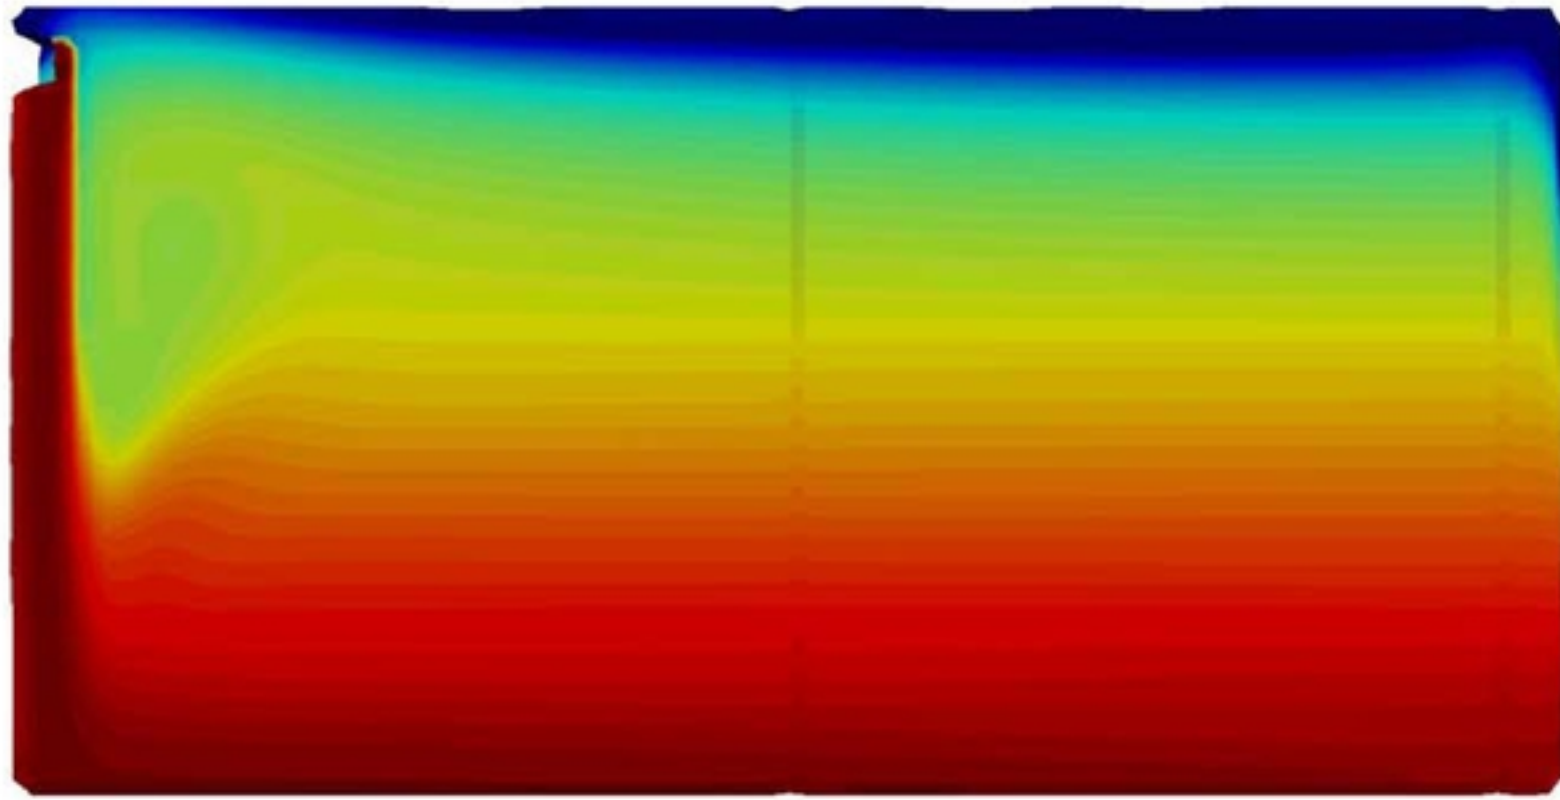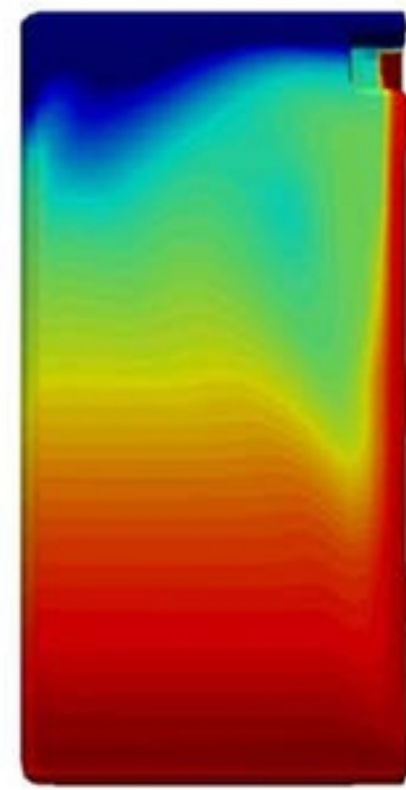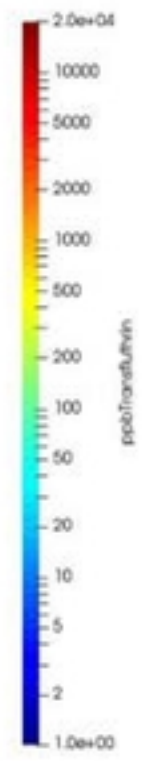

A

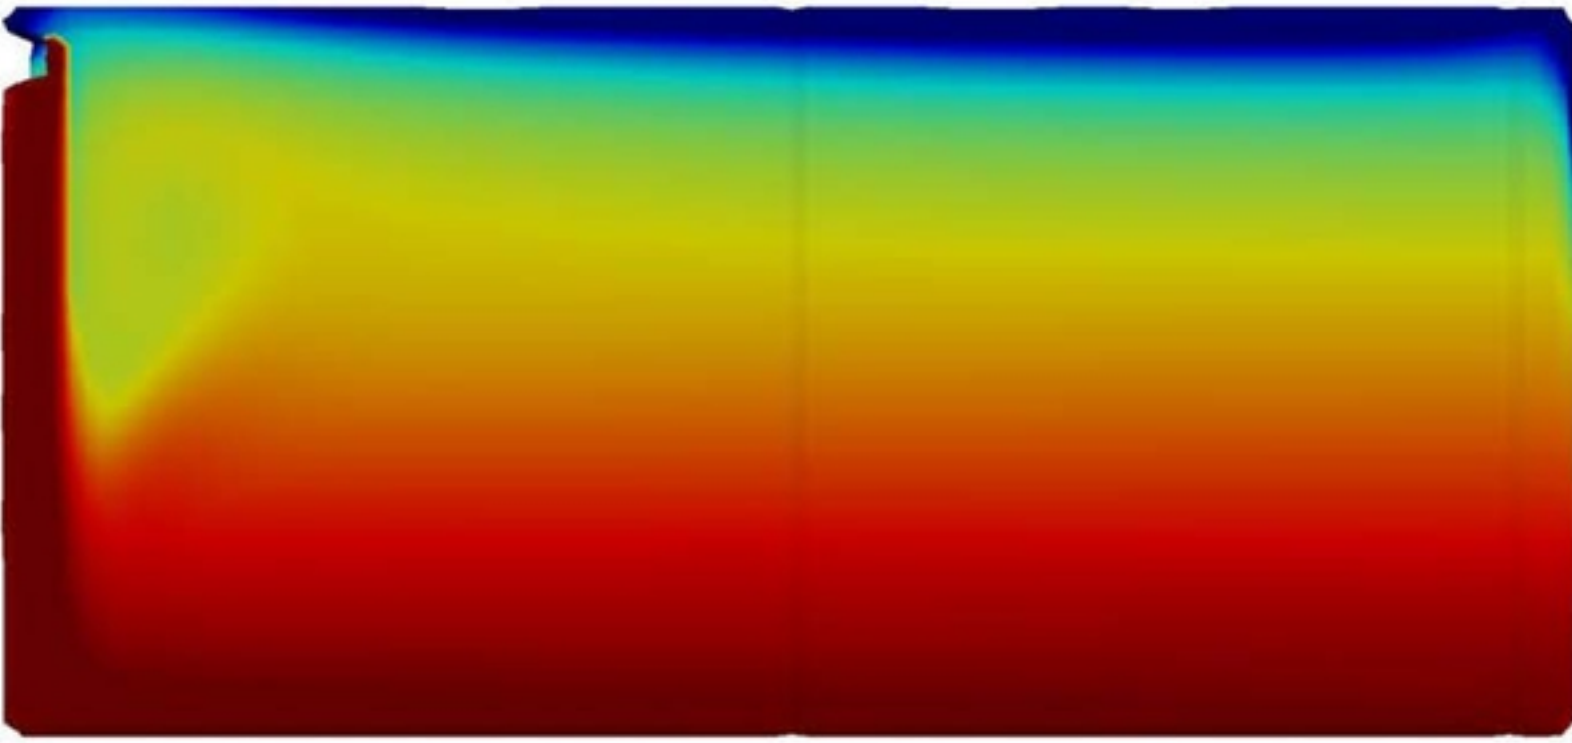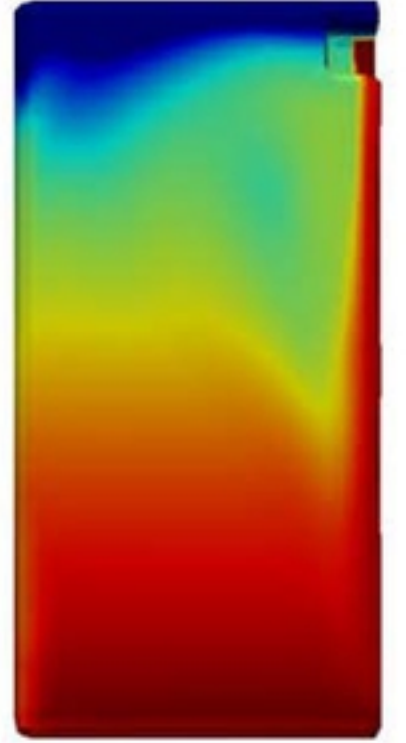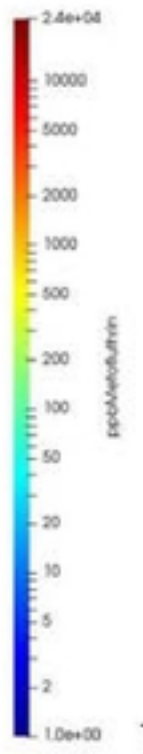

B.

Figure 3



### Transfluthrin Concentration at 25 min

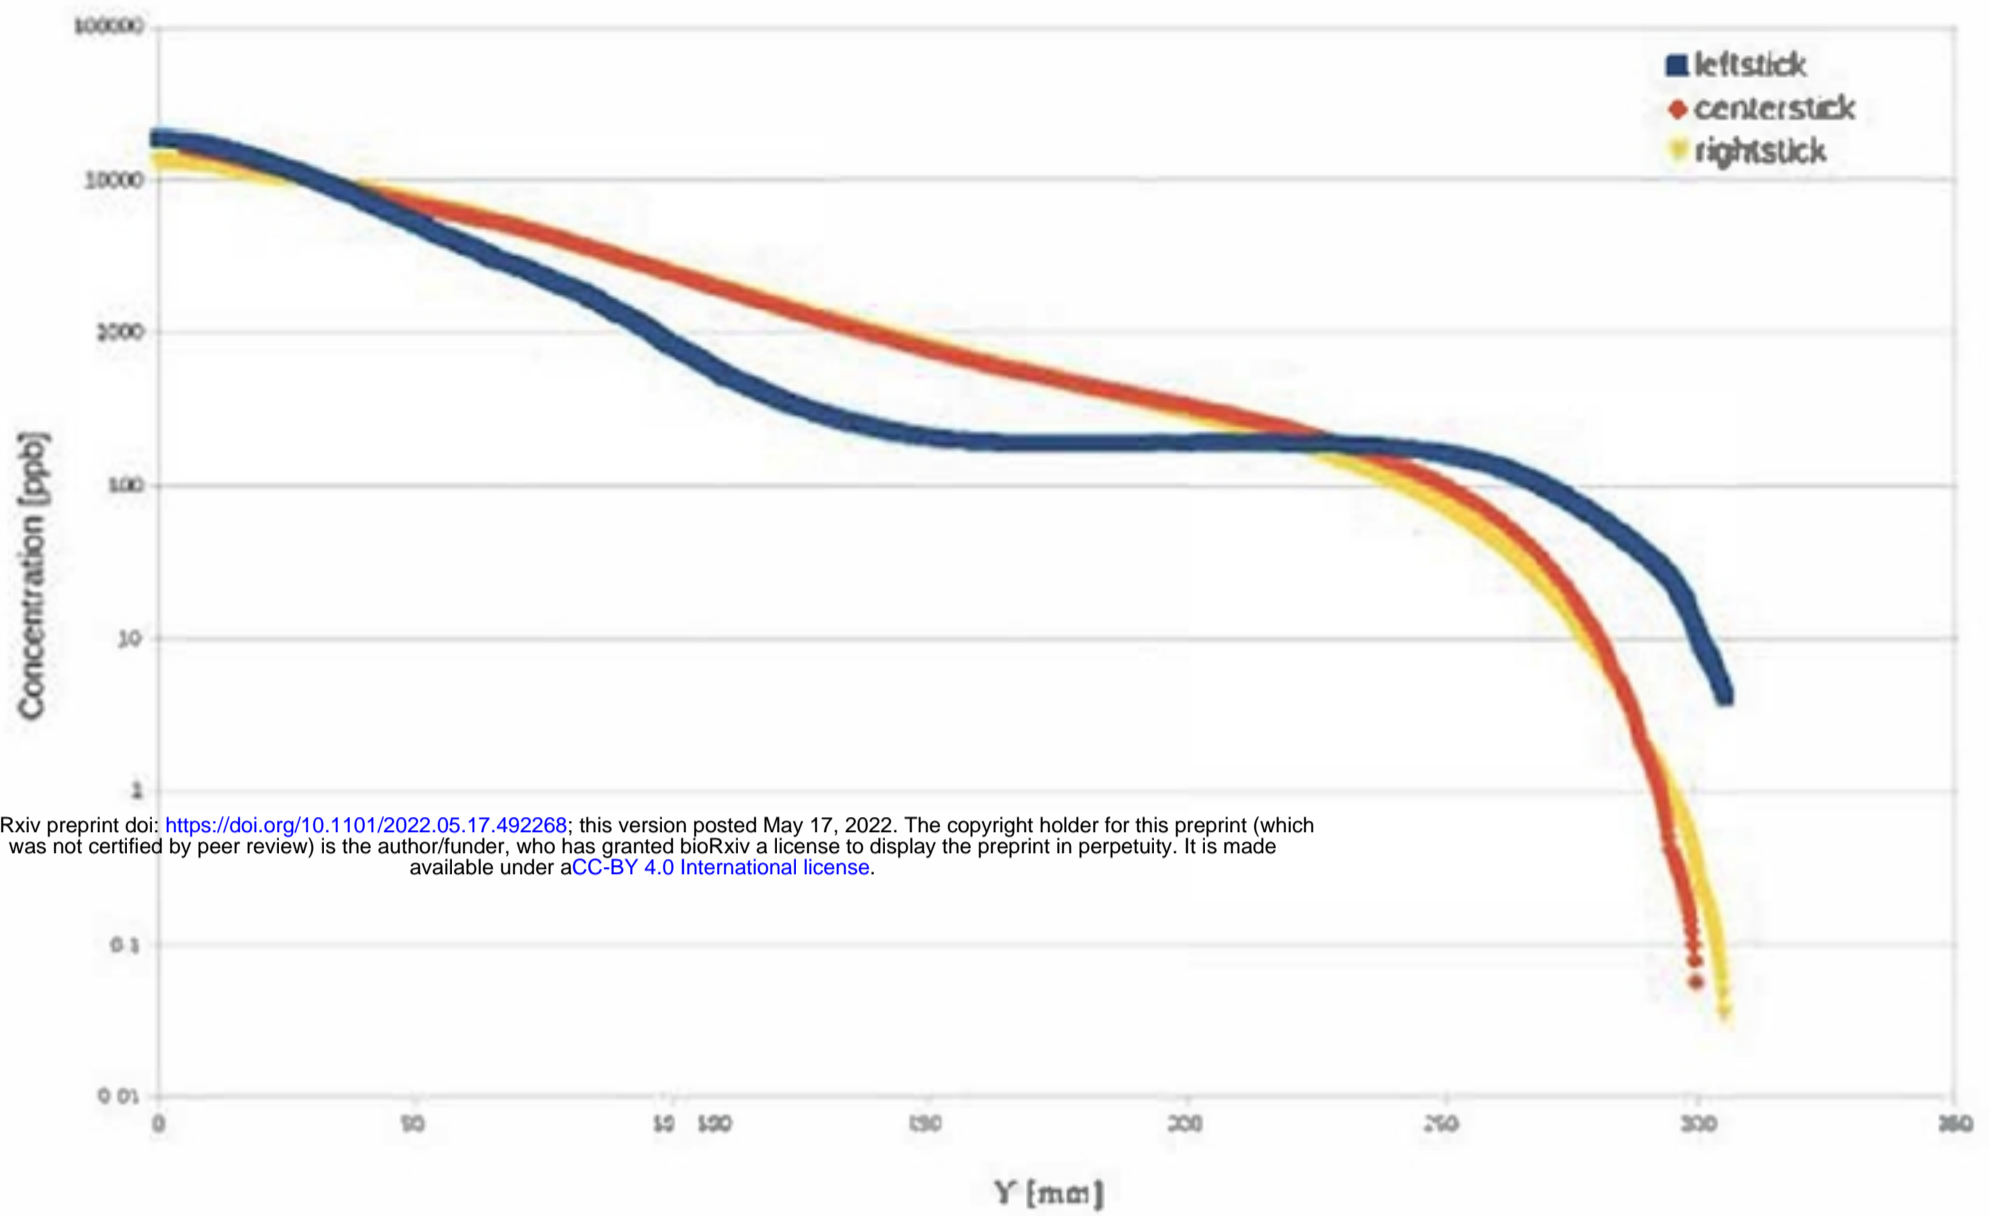

bioRxiv preprint doi: <https://doi.org/10.1101/2022.05.17.492268>; this version posted May 17, 2022. The copyright holder for this preprint (which was not certified by peer review) is the author/funder, who has granted bioRxiv a license to display the preprint in perpetuity. It is made available under aCC-BY 4.0 International license.

A.

### Metofluthrin Concentration at 25 min

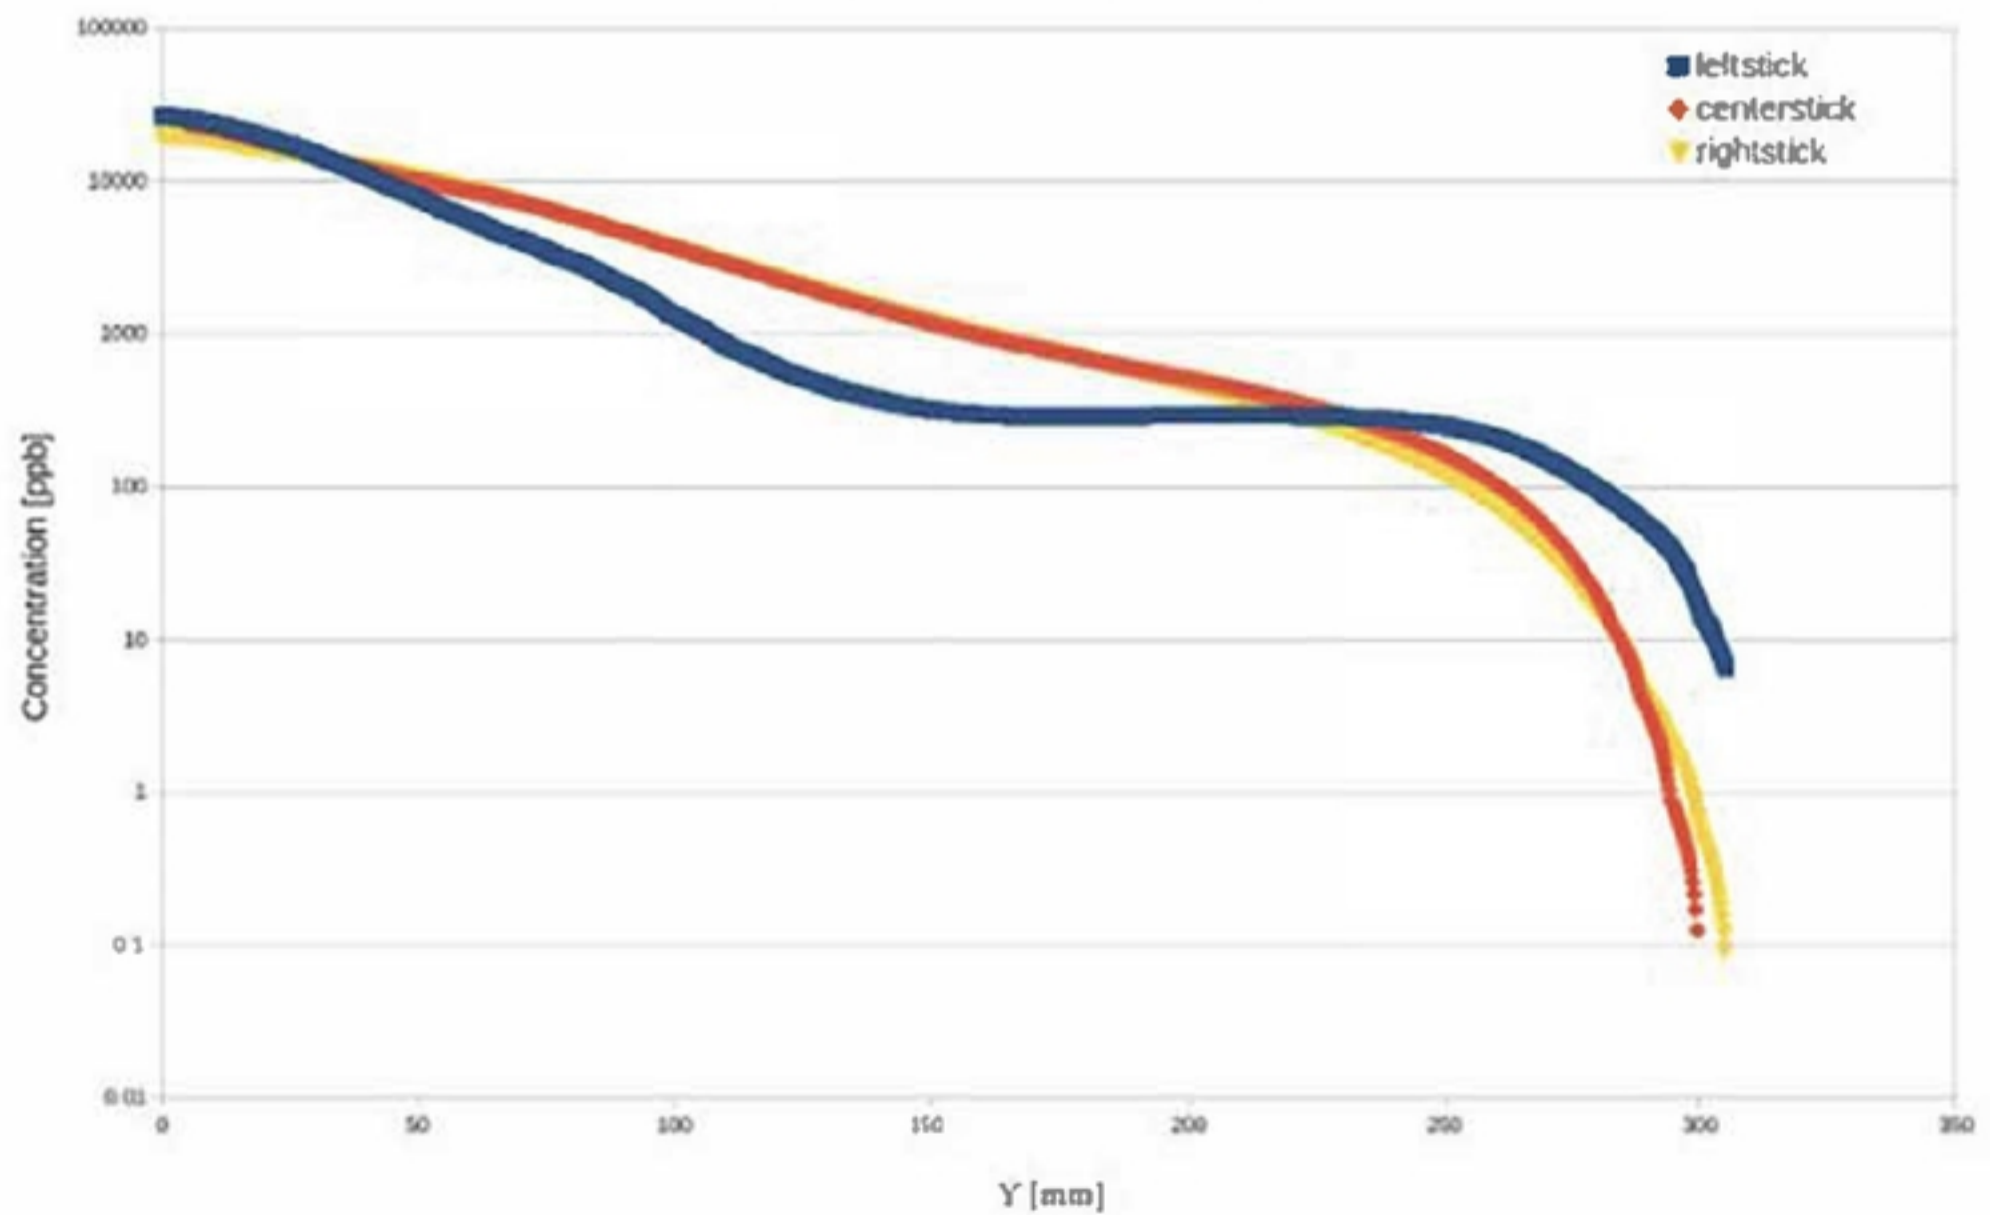

B.

Figure 4

### Climbing Height Reduction

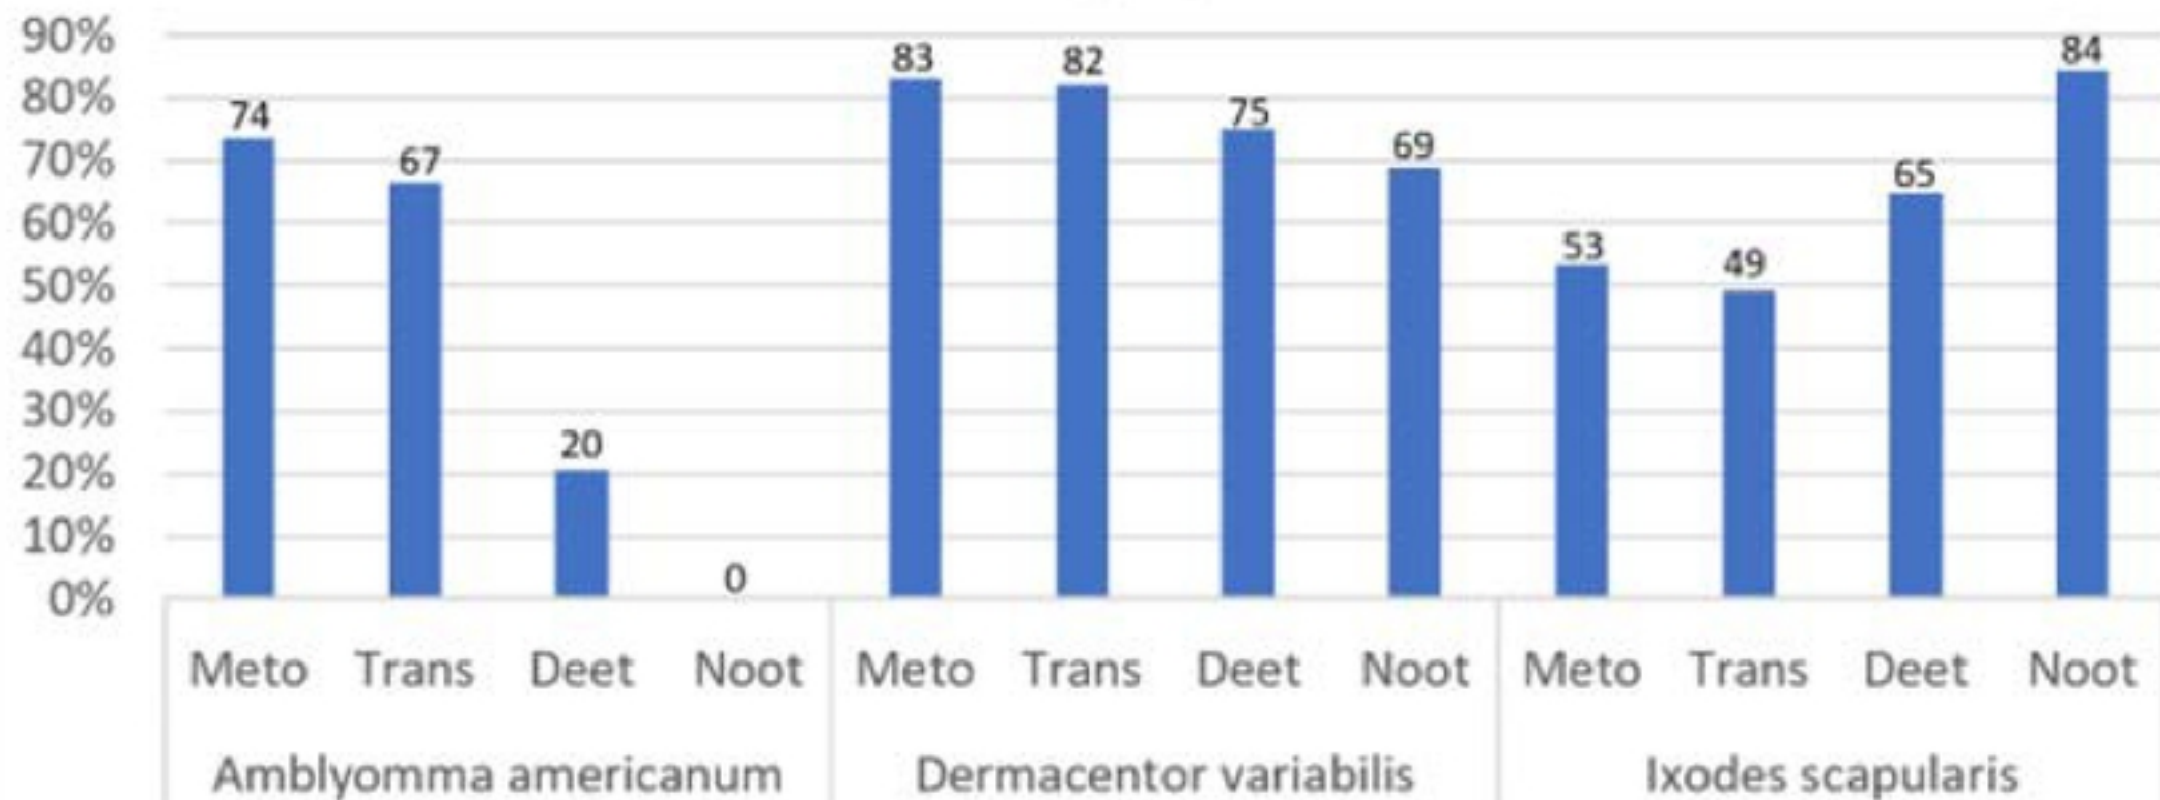

Figure 5

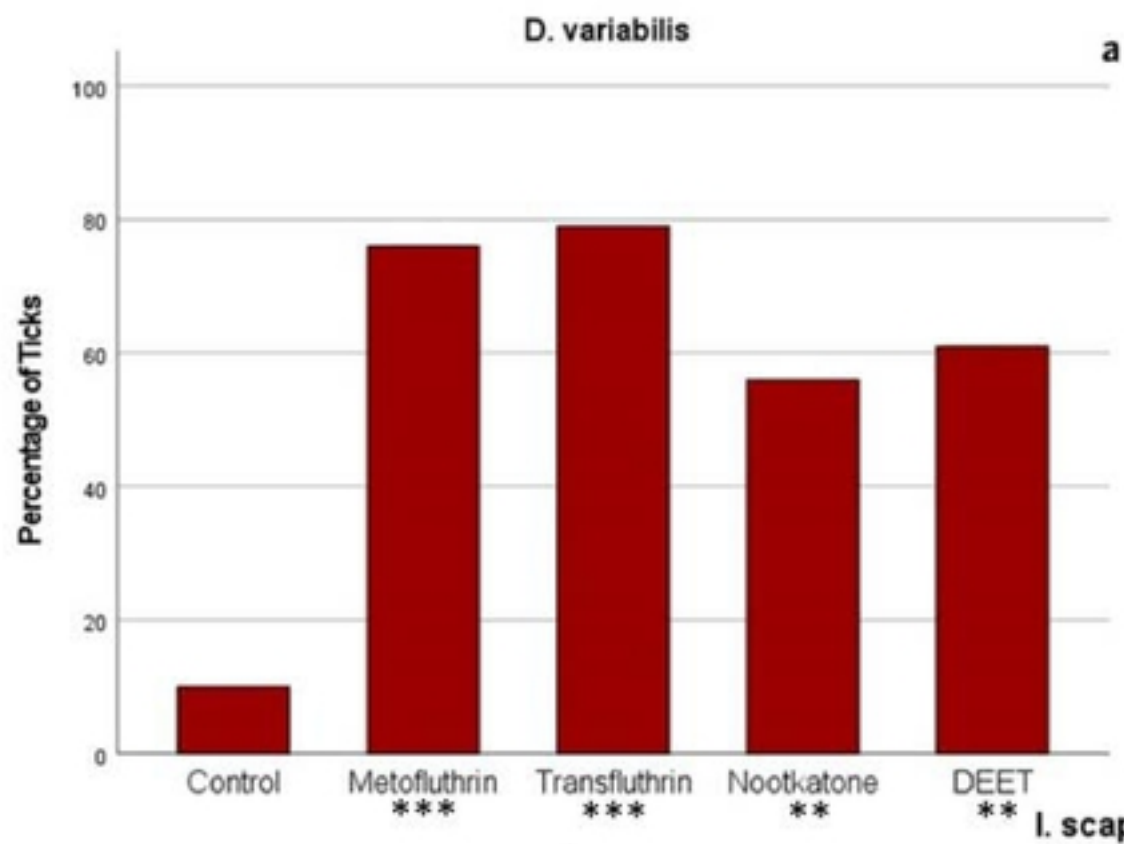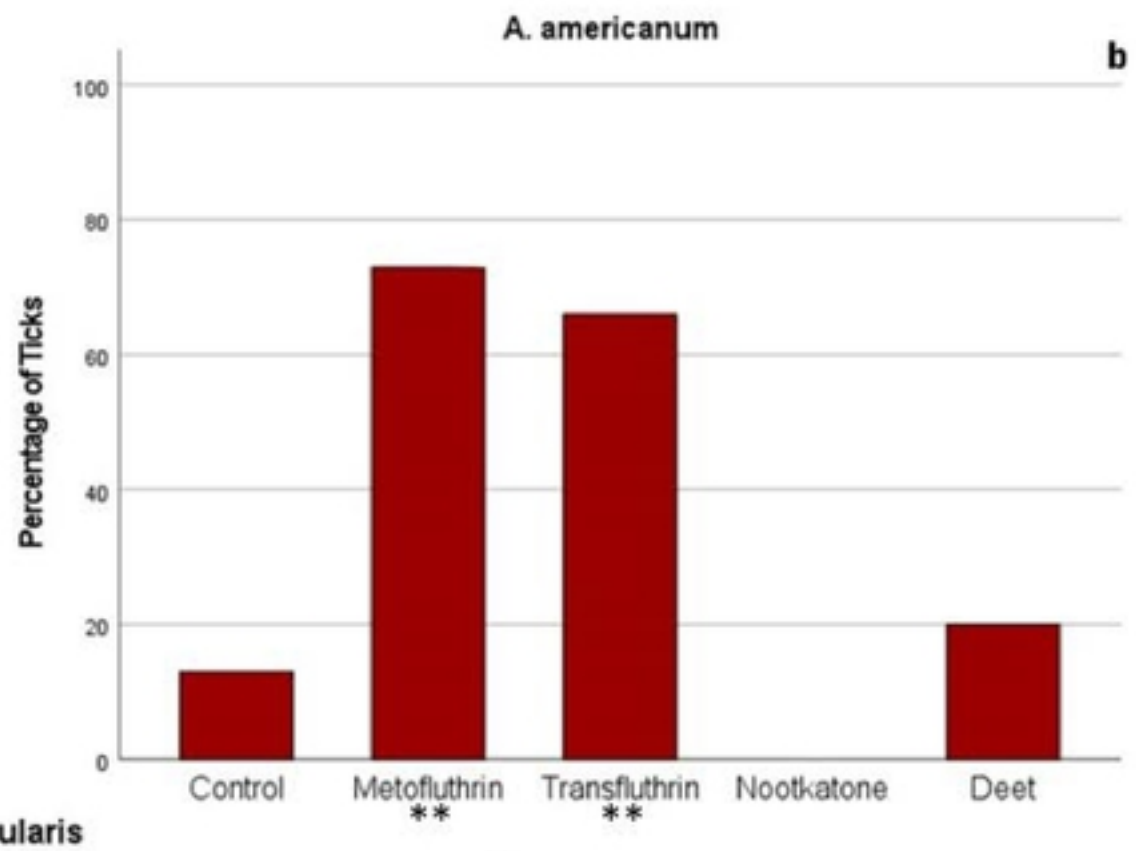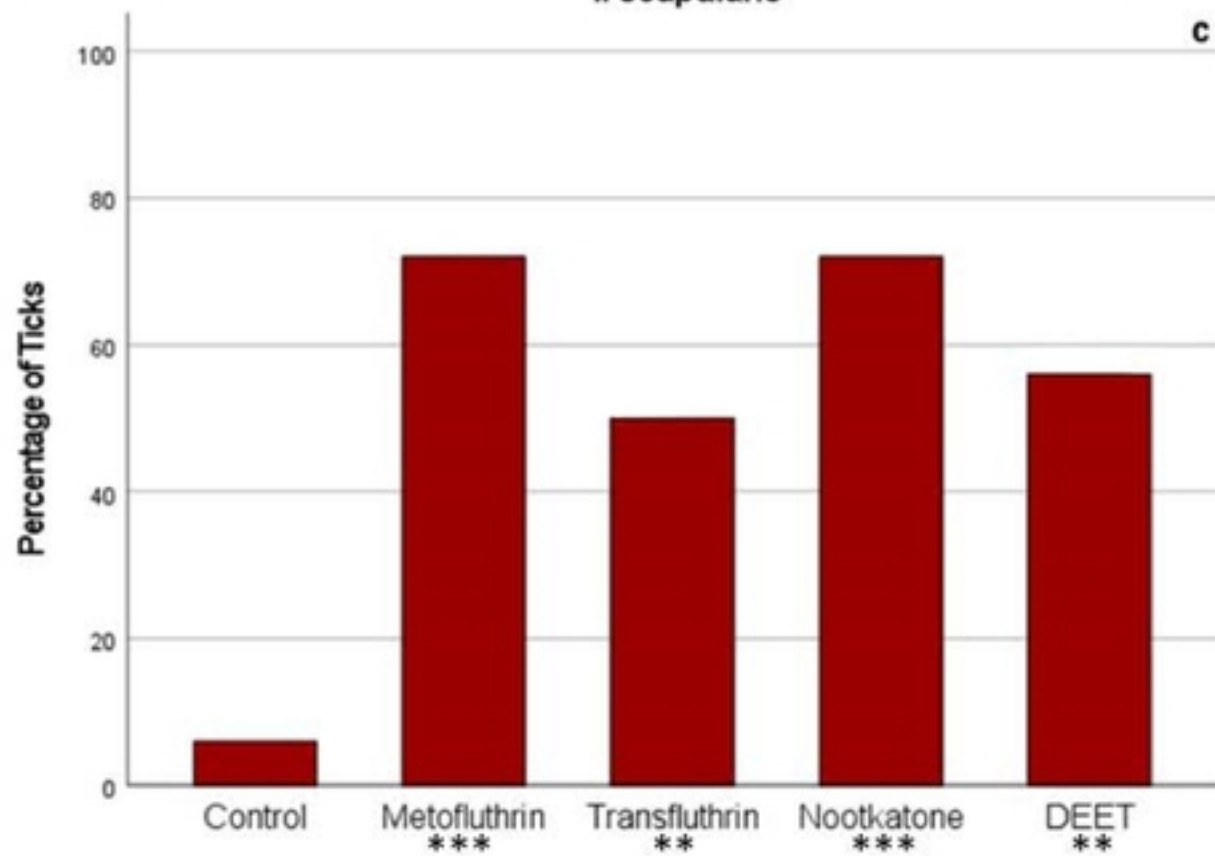

Figure 6

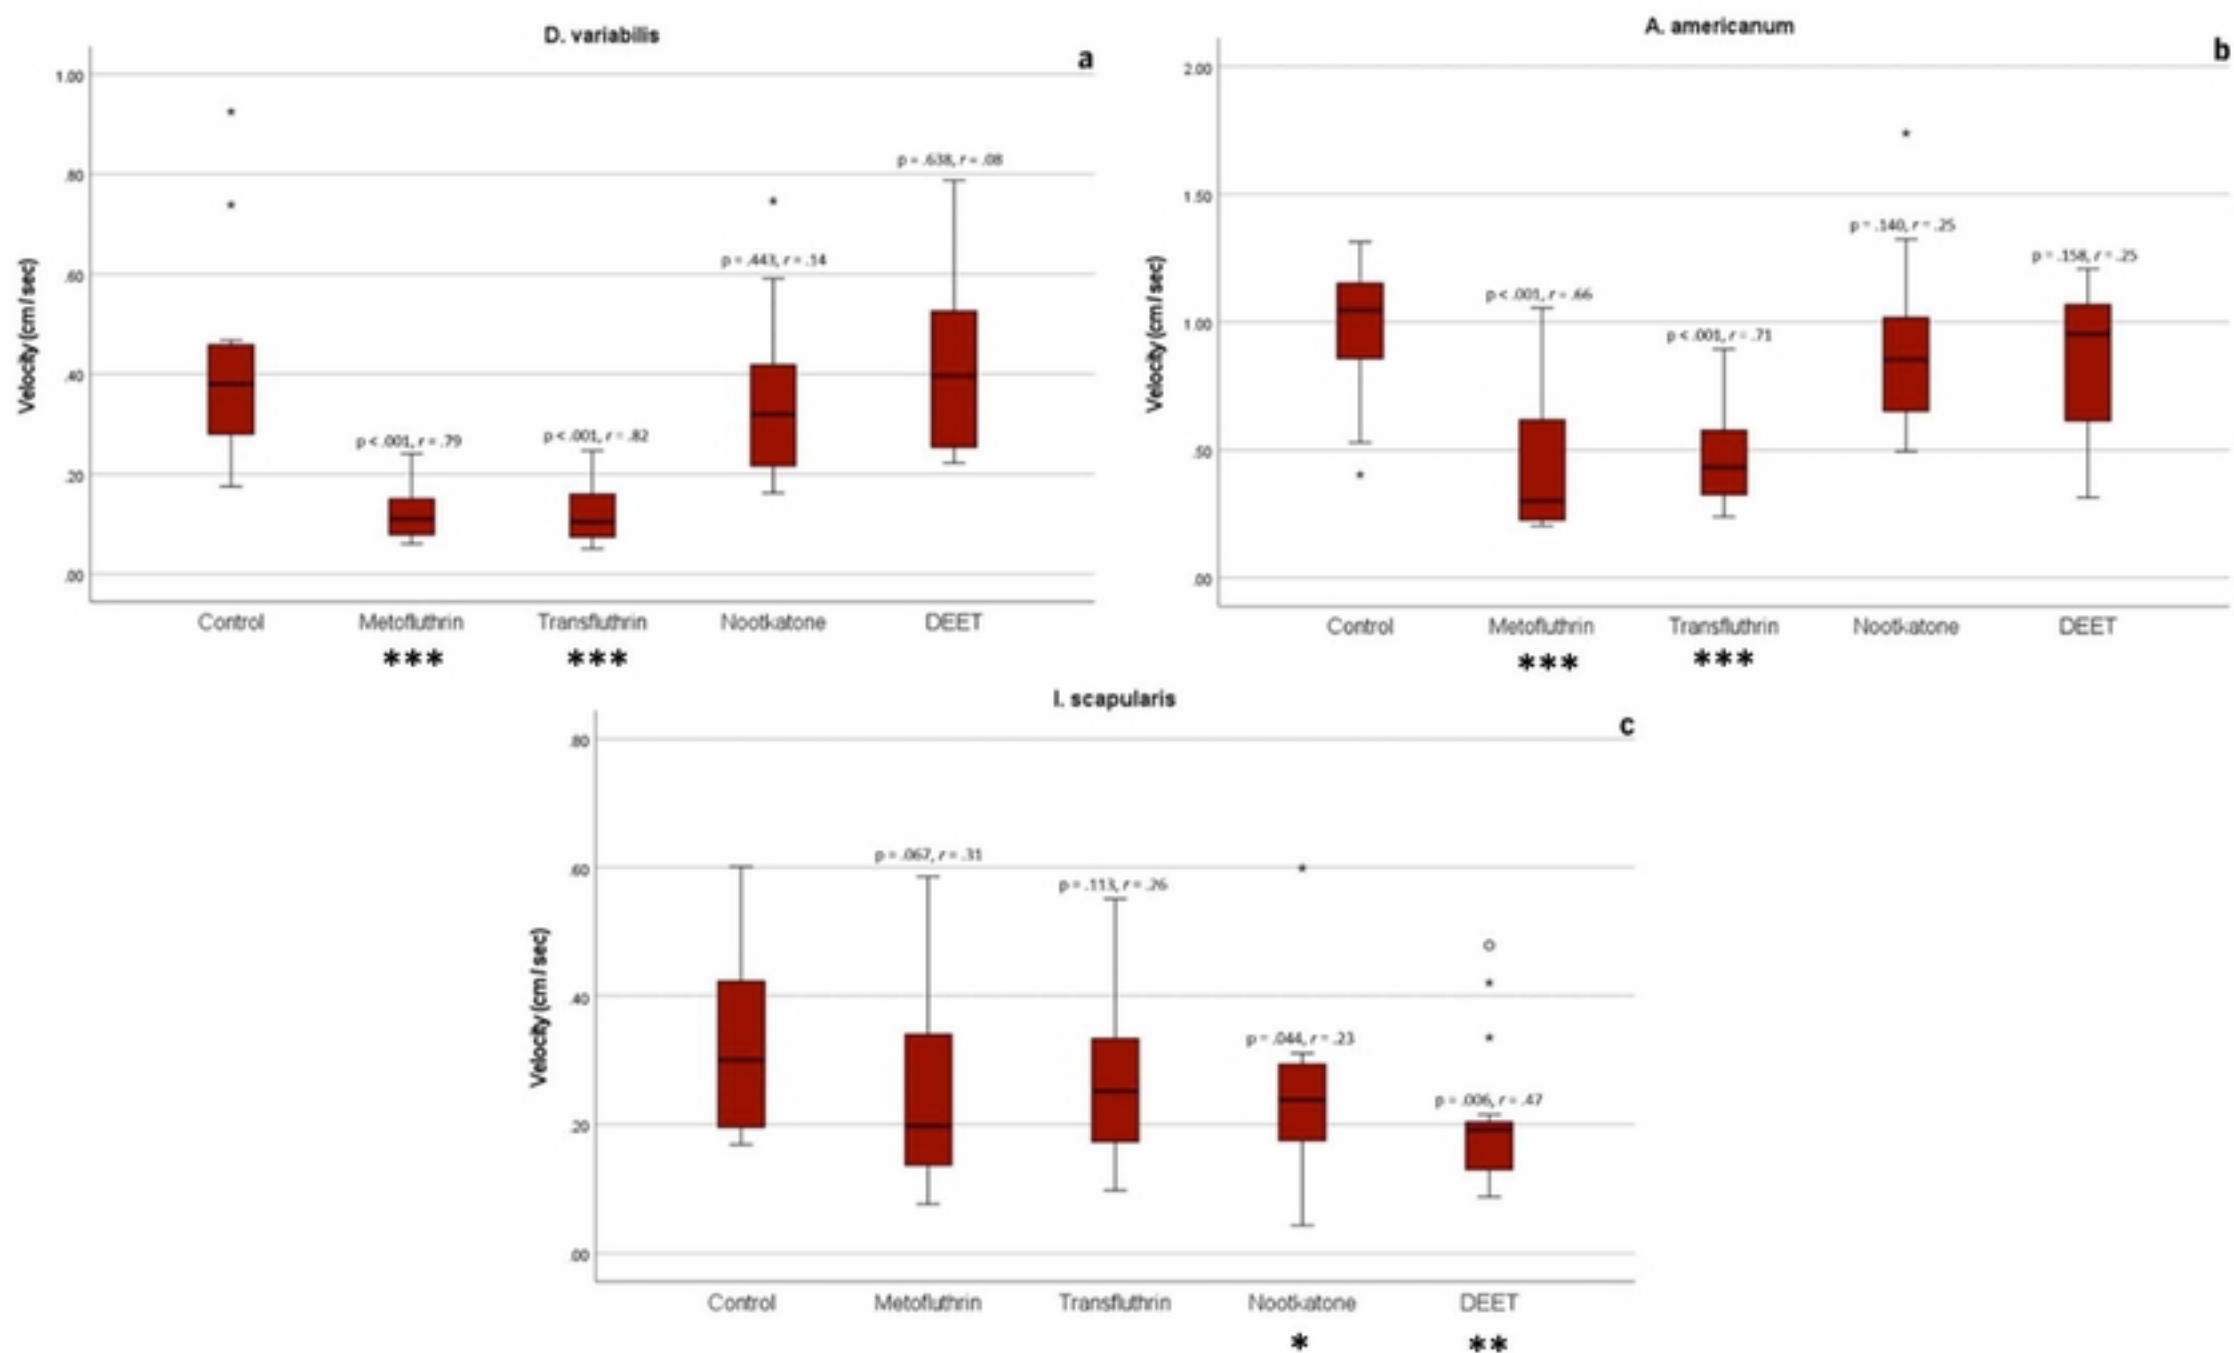

Figure 7

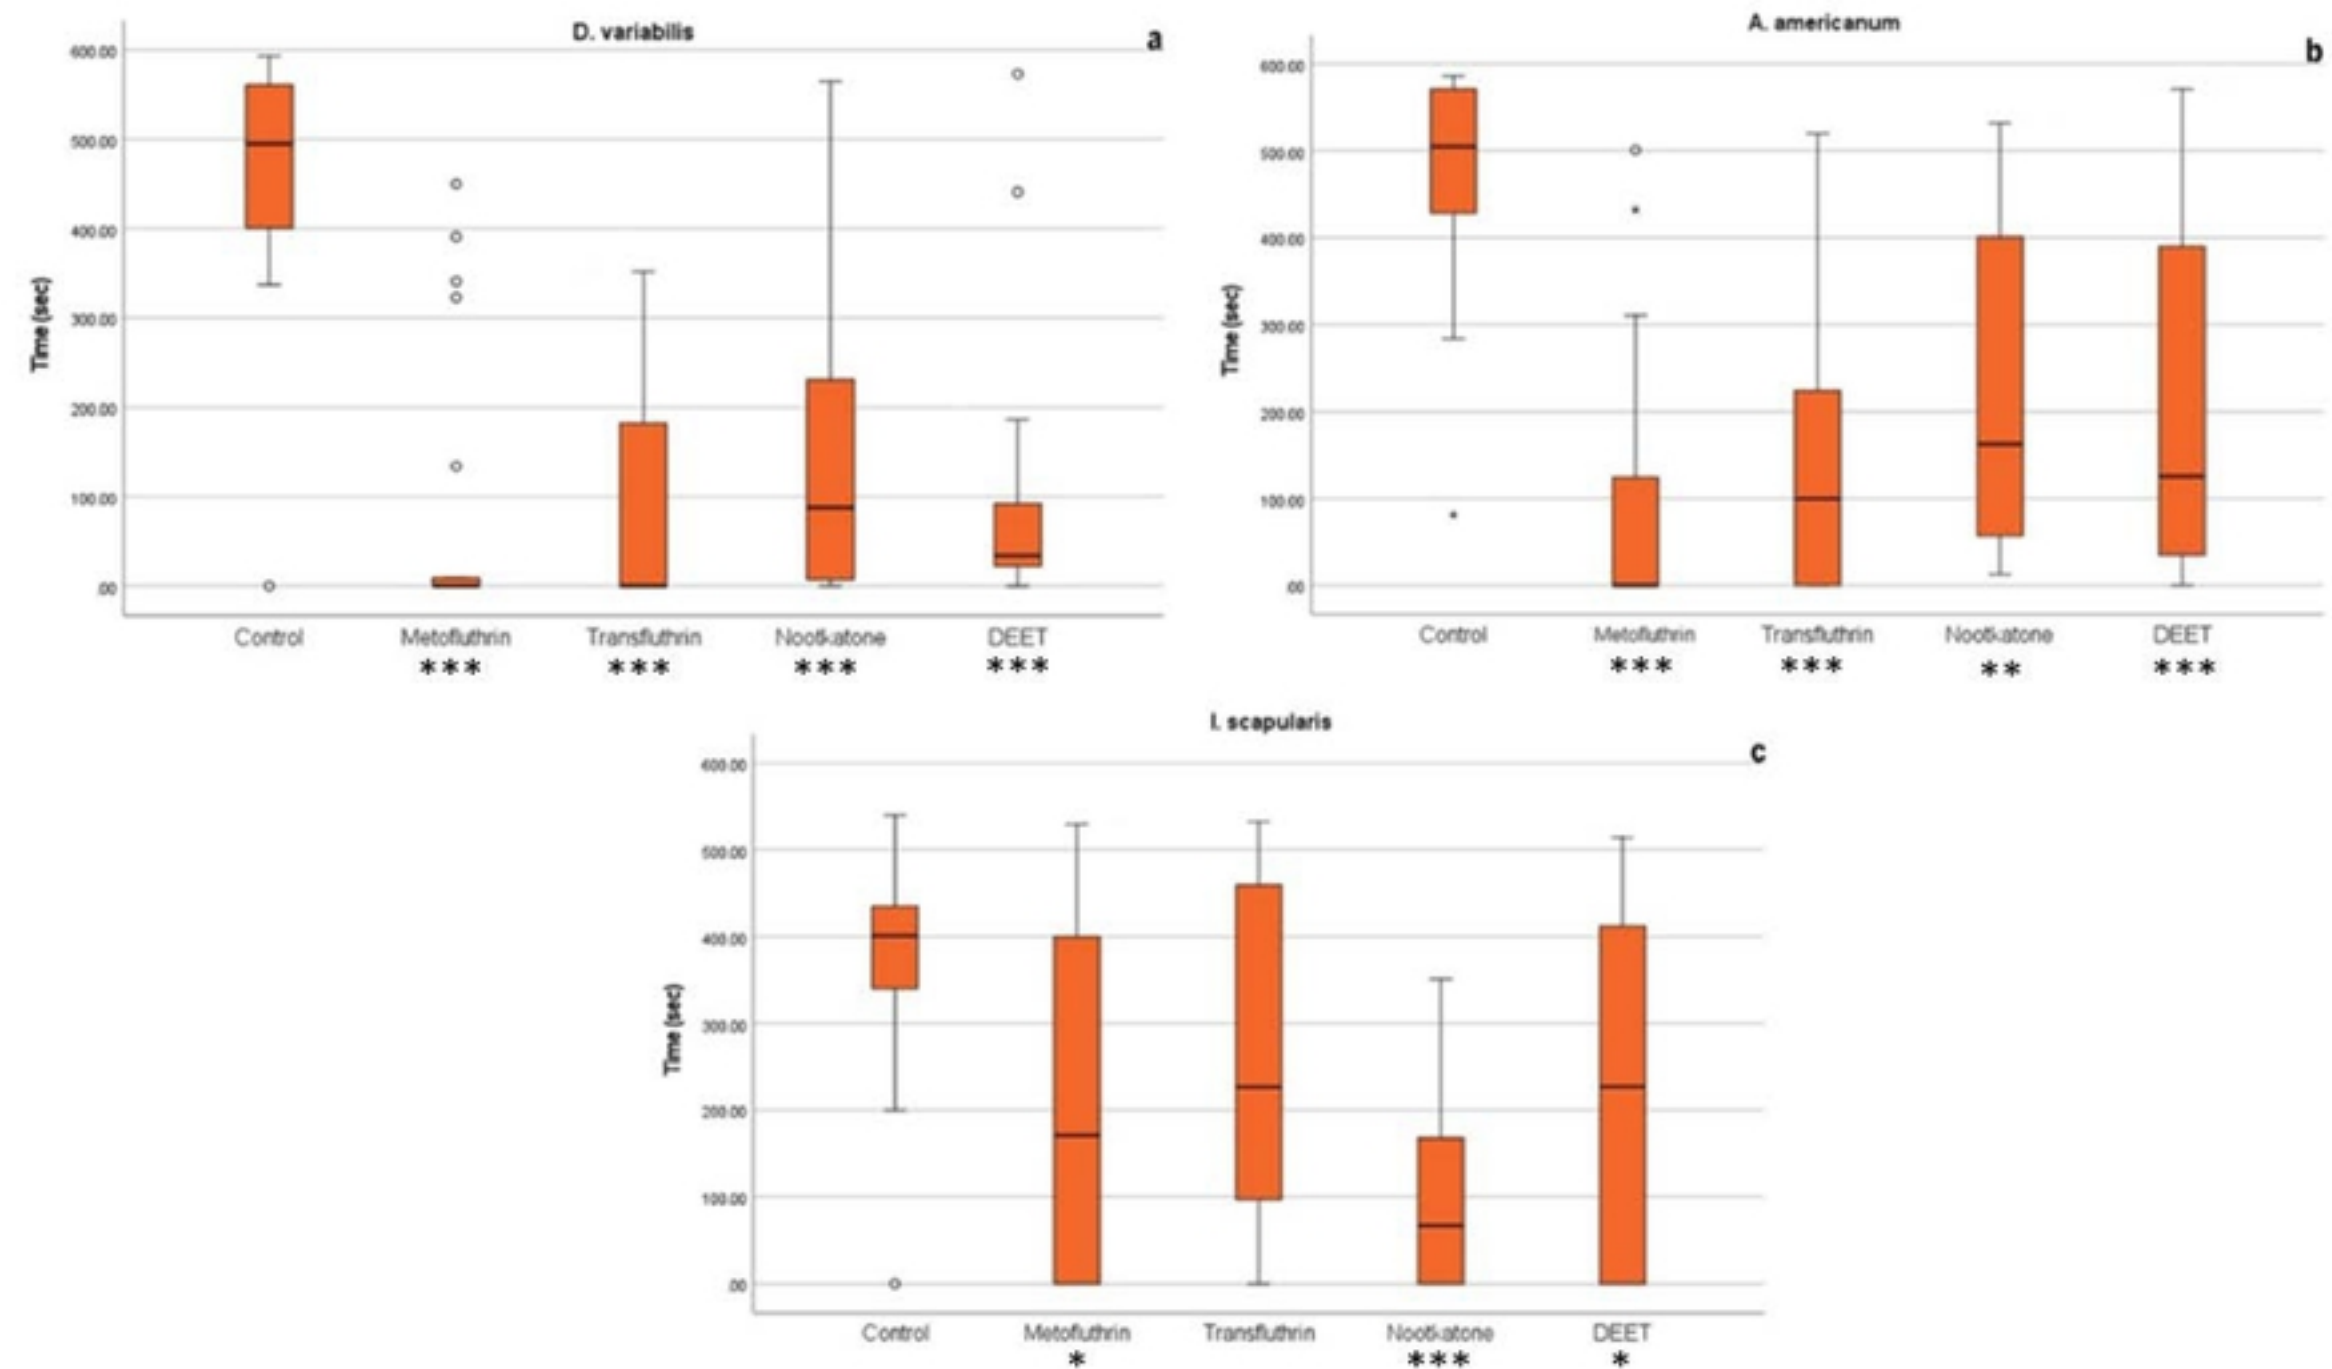

Figure 8
